# Supplementary material for: Palladium(ii)-catalyzed meta-selective direct arylation of O-β-naphthyl carbamate
Source: Royal Society of Chemistry journal article supplement (doi:10.1039/c4cc07997c), 2014-11-20

## **Palladium(II)-Catalyzed *meta*-Selective Direct Arylation of *O*- $\beta$ -Naphthyl Carbamate**

Jingchang Zhang,<sup>[a]</sup> Qingwen Liu,<sup>[a]</sup> Xufei Liu<sup>[b]</sup>, Suoqin Zhang,<sup>\*[a]</sup> Pingping Jiang,<sup>[a]</sup> Yanxiang Wang,<sup>[a]</sup>  
Shengyuan Luo,<sup>[a]</sup> Yang Li<sup>[a]</sup> and Qifeng Wang<sup>\*[a], [b]</sup>

### **Table of cotents**

|                                                                      |     |
|----------------------------------------------------------------------|-----|
| (A) General information .....                                        | S2  |
| (B) Optimisation for the palladium-catalyzed Coupling Reaction ..... | S2  |
| (C) Genaral Procedure for Coupling Reaction .....                    | S3  |
| (D) Experimental data of isolated compound .....                     | S4  |
| (E) Copies of <sup>1</sup> H and <sup>13</sup> C spectra .....       | S12 |

## (A) General information

Unless otherwise noted, all the reactions were performed under N<sub>2</sub> atmosphere using Schlenk technique. All reagents were used without purification as commercially available. All reactions were monitored by thin layer chromatography. Purification of reaction products were carried out by flash chromatography on silica gel. Chemical yields refer to pure isolated substances. The melting point was recorded on a melting point apparatus (MPA100, Stanford Research Systems, Inc.). <sup>1</sup>H NMR and <sup>13</sup>C NMR spectra were recorded on Bruker 300 MHz spectrometers (300 MHz for <sup>1</sup>H NMR and 75 MHz for <sup>13</sup>C NMR). Chemical shifts of <sup>1</sup>H and <sup>13</sup>C signals were given in δ relative to the solvents residual <sup>1</sup>H-signal (CH<sub>2</sub>Cl<sub>2</sub>, δ(H) 7.26, DMSO, δ(H) 2.50) or to Me<sub>4</sub>Si (δ 0.0). CDCl<sub>3</sub> resonance in the <sup>13</sup>C spectrum is 77.2 ppm and DMSO resonance in the <sup>13</sup>C spectrum is 39.5 ppm. The following abbreviations are used: s, singlet, d, doublet, t, triplet, q, quartet, quint, quintuplet, m, multiplet, br, broad. High-resolution mass spectral analysis (HRMS) datas were measured on a Bruker ApexII mass spectrometer by means of the ESI technique.

## (B) Optimization of the reaction conditions for *meta*-C-H bond direct arylation.

*O*-β-naphthyl dimethylcarbamate (43.0 mg, 0.2 mmol) **1a**, phenyl boronic acid (73.2 mg, 0.6 mmol) **2a**, Oxidants and Pd(OAc)<sub>2</sub> (2.24 mg, 0.01 mmol) were added to a Schlenk tube. The tube was degassed and refilled with N<sub>2</sub> for three times. Then solvent (1 ml, 0.2 M) was added by syringe. The reaction mixture was stirred at room temperature for the indicated length of time in Table 1. Then the reaction mixture was filtered through celite and washed with CH<sub>2</sub>Cl<sub>2</sub>. The mixture was neutralized with saturated K<sub>2</sub>CO<sub>3</sub> aqueous solution. The aqueous phase was re-extracted with CH<sub>2</sub>Cl<sub>2</sub> (3 × 10 ml). The combined organic extracts were dried over Na<sub>2</sub>SO<sub>4</sub> and the solvent was removed under reduced pressure. 1-(3-nitrophenyl) ethanone (33.0mg, 0.2mmol) was added and the mixture was dissolved in 1ml CDCl<sub>3</sub>. An aliquot was removed and the yield was determined by <sup>1</sup>H NMR spectroscopy. Chemical shifts of methyl groups in **1a**, **3ab** and internal standard were given in Scheme 1.

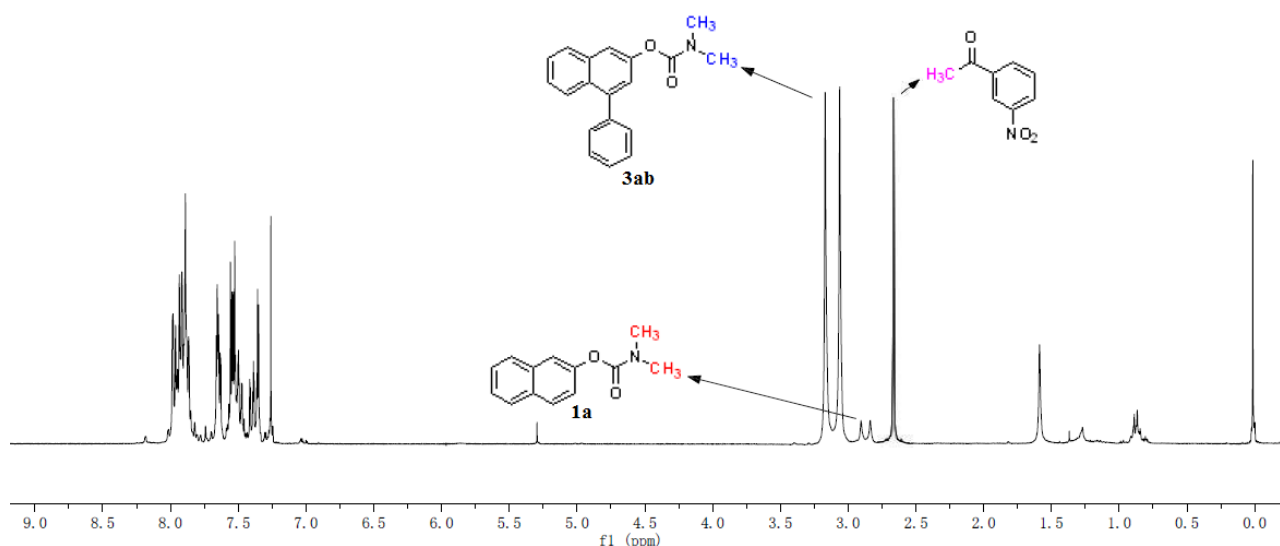

Scheme 1. Chemical shifts of methyl groups in **1a**, **3ab** and internal standard. NMR yields were calculated according to the integration of methyl groups.

Table 1. Optimization of the reaction conditions for *meta*-C-H bond direct arylation.

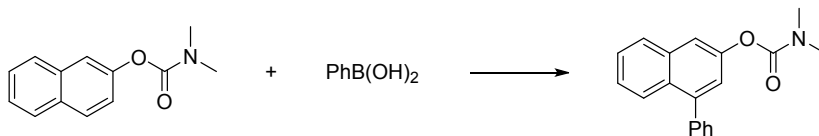

| Entry          | Catalyst(mol%)           | Oxidant(equiv)                                   | Solvent      | Additive(equiv)                       | T(°C) | Time(h) | Yield(%) |
|----------------|--------------------------|--------------------------------------------------|--------------|---------------------------------------|-------|---------|----------|
| 1              | Pd(OAc) <sub>2</sub> (5) | Cu(TfO) <sub>2</sub> (2)/Ag <sub>2</sub> O(0.5)  | Toluene      | -                                     | 120   | 24      | --       |
| 2              | Pd(OAc) <sub>2</sub> (5) | BQ(2)/O <sub>2</sub> (1atm)                      | t-BuOH       | K <sub>2</sub> HPO <sub>4</sub> (1.5) | 100   | 24      | --       |
| 3              | Pd(OAc) <sub>2</sub> (5) | Cu(OAc) <sub>2</sub> (2)                         | TFA          | O <sub>2</sub> (1 atm)                | 25    | 24      | --       |
| 4 <sup>b</sup> | Pd(OAc) <sub>2</sub> (5) | AgOAc(2)                                         | TFA          | -                                     | 50    | 36      | --       |
| 5 <sup>b</sup> | Pd(OAc) <sub>2</sub> (5) | AgOAc(2)                                         | TFA          | -                                     | 100   | 36      | < 5      |
| 6              | Pd(OAc) <sub>2</sub> (5) | K <sub>2</sub> S <sub>2</sub> O <sub>8</sub> (6) | TFA          | -                                     | 70    | 36      | 15       |
| 7              | Pd(OAc) <sub>2</sub> (5) | K <sub>2</sub> S <sub>2</sub> O <sub>8</sub> (6) | TFA          | -                                     | 50    | 36      | 42       |
| 8              | Pd(OAc) <sub>2</sub> (5) | K <sub>2</sub> S <sub>2</sub> O <sub>8</sub> (6) | TFA          | -                                     | 25    | 36      | 45       |
| 9              | Pd(OAc) <sub>2</sub> (5) | K <sub>2</sub> S <sub>2</sub> O <sub>8</sub> (6) | TFA          | AgOAc(0.05)                           | 25    | 36      | 56       |
| 10             | Pd(OAc) <sub>2</sub> (5) | K <sub>2</sub> S <sub>2</sub> O <sub>8</sub> (6) | TFA:HOAc=1:1 | AgOAc(0.05)                           | 25    | 36      | 72       |
| 11             | Pd(OAc) <sub>2</sub> (5) | K <sub>2</sub> S <sub>2</sub> O <sub>8</sub> (6) | TFA:HOAc=2:1 | AgOAc(0.05)                           | 25    | 36      | 84       |
| 12             | Pd(OAc) <sub>2</sub> (5) | K <sub>2</sub> S <sub>2</sub> O <sub>8</sub> (6) | TFA:HOAc=3:1 | AgOAc(0.05)                           | 25    | 36      | 70       |
| 13             | Pd(OAc) <sub>2</sub> (5) | K <sub>2</sub> S <sub>2</sub> O <sub>8</sub> (3) | TFA:HOAc=2:1 | AgOAc(0.05)                           | 25    | 36      | 74       |
| 14             | Pd(OAc) <sub>2</sub> (5) | K <sub>2</sub> S <sub>2</sub> O <sub>8</sub> (6) | TFA:HOAc=2:1 | AgOAc(0.05)                           | 25    | 12      | 64       |
| 15             | Pd(OAc) <sub>2</sub> (5) | K <sub>2</sub> S <sub>2</sub> O <sub>8</sub> (6) | TFA:HOAc=2:1 | AgOAc(0.05)                           | 25    | 48      | 75       |

<sup>a</sup> Yields were determined by <sup>1</sup>H NMR using 1-(3-nitrophenyl) ethanone as an internal standard. <sup>b</sup> Using PhI (3 eq.) to replace PhB(OH)<sub>2</sub>.

### (C) General Procedure for *meta*-direct arylation.

*O*-β-naphthyl dimethylcarbamate (**1a**) (1.0 mmol), aryl boronic acid (3 mmol), K<sub>2</sub>S<sub>2</sub>O<sub>8</sub> (6 mmol), AgOAc (0.05 mmol) and Pd(OAc)<sub>2</sub> (0.05 mmol) were added to a Schlenk tube. The tube was degassed and refilled with N<sub>2</sub> for three times. Then solvent (TFA:AcOH=2:1, v/v, 5ml) was added by syringe. The reaction mixture was stirred at room temperature and monitored by TLC analysis. After the starting material was completely consumed, the reaction mixture was filtrated through celite and washed with CH<sub>2</sub>Cl<sub>2</sub>. The mixture was neutralized with saturated K<sub>2</sub>CO<sub>3</sub> aqueous solution. The aqueous phase was extracted with CH<sub>2</sub>Cl<sub>2</sub> (3 × 20 ml). The combined organic phase were dried over Na<sub>2</sub>SO<sub>4</sub> and concentrated under reduced pressure, the residue was purified by flash chromatography on silica gel (petroleum ether/dichloromethane as an eluent) to afford the *meta*-arylated product.

## (D) Experimental data of isolated compounds

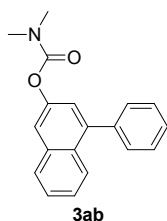

### 4-phenylnaphthalen-2-yl dimethylcarbamate (**3ab**)

The reaction was performed according to the general procedure for 36 hours. Flash chromatography (petroleum ether: dichloromethane=1:1) yielded the product **3ab** (216.6 mg, 74%), Colorless oil.

**<sup>1</sup>H NMR** (300 MHz, dmso)  $\delta$  7.98 (d,  $J$  = 8.1 Hz, 1H), 7.79 (d,  $J$  = 8.1 Hz, 1H), 7.72 (d,  $J$  = 2.1 Hz, 1H), 7.58 – 7.44 (m, 7H), 7.24 (d,  $J$  = 2.4 Hz, 1H), 3.10 (s, 3H), 2.94 (s, 3H).

**<sup>13</sup>C NMR** (75 MHz, dmso)  $\delta$ (ppm) 154.0, 148.3, 140.8, 139.0, 133.9, 129.5(2C), 128.5, 128.4 (2C), 127.9, 127.6, 126.4, 125.7, 125.1, 122.5, 117.9, 36.2, 36.1.

**HRMS** (ESI)  $m/z$  calcd for C<sub>19</sub>H<sub>17</sub>NO<sub>2</sub> ([M+H]<sup>+</sup>):292.1332, found: 292.1334.

To confirm the structure of **3ab** data is *meta*-arylated product, we removed the carbamate group and procedure and the NMR data is shown below:

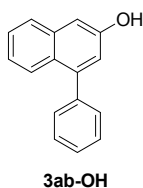

### 4-phenylnaphthalen-2-ol (**3ab-OH**)

To a flask was added **3ab** (87.4 mg, 0.3 mmol), NaOH (120 mg, 3 mmol), EtOH (3ml), the mixture was refluxed for overnight. After that, the reaction mixture was diluted with CH<sub>2</sub>Cl<sub>2</sub> through celite and washed with water (1 × 5 ml). The aqueous phase was re-extracted with CH<sub>2</sub>Cl<sub>2</sub> (3 × 5 ml). The combined organic phase were dried over Na<sub>2</sub>SO<sub>4</sub> and concentrated under reduced pressure, the residue was purified by flash chromatography (petroleum ether: ethyl acetate=7:1) to afford the product **3ab-OH** (60.1 mg, 91%), Red oil.

**<sup>1</sup>H NMR** (300 MHz, cdcl<sub>3</sub>)  $\delta$  7.80 (d,  $J$  = 8.4 Hz, 1H), 7.74 (d,  $J$  = 8.1 Hz, 1H), 7.51 – 7.42 (m, 6H), 7.30 – 7.26 (m, 1H), 7.18 (d,  $J$  = 2.7 Hz, 1H), 7.07 (d,  $J$  = 2.7 Hz, 1H), 5.16 (br, 1H).

**<sup>13</sup>C NMR** (75 MHz, cdcl<sub>3</sub>)  $\delta$  152.8, 142.6, 140.3, 135.4, 130.1 (2C), 128.4 (2C), 127.6, 127.5, 127.0, 126.6, 126.2, 123.9, 118.9, 109.4.

**HRMS** (ESI)  $m/z$  calcd for C<sub>16</sub>H<sub>12</sub>O ([M+H]<sup>+</sup>):221.2733, found: 221.2730.

The NMR data is consistent with that reported in the literature.<sup>1</sup>

In <sup>13</sup>C NMR of **3ab**, the chemical shifts of 117.9 and 122.5 ppm are assigned to *ortho*-sites of carbamate group. In its substrate *O*- $\beta$ -naphthyl dimethylcarbamate **1a**, the corresponding chemical shifts are 118.3 and 121.5. From the chemical shifts and height of the peaks, we can confirm the *ortho*-sites of carbamate group in **3ab** are C-H bonds without any substitution. In the examples below,

these two chemical shifts exist in acceptable changes. Also to confirm again the structure, **3ae** was converted to its corresponding **3ae-OH** and the structure is consistent with that reported in the literature.<sup>1</sup>

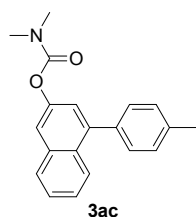

#### 4-(p-tolyl)naphthalen-2-yl dimethylcarbamate (**3ac**)

The reaction was performed according to the general procedure for 40 hours. Flash chromatography (petroleum ether: dichloromethane=1:1) yielded the product **3ac** (186.3 mg, 61%), Colorless oil.

**<sup>1</sup>H NMR** (300 MHz,  $\text{cdCl}_3$ )  $\delta$ (ppm) 7.89 (d,  $J$  = 8.4 Hz, 1H), 7.84 (d,  $J$  = 8.1 Hz, 1H), 7.60 (d,  $J$  = 2.4 Hz, 1H), 7.50 – 7.35 (m, 4H), 7.30 (s, 1H), 7.28 (d,  $J$  = 0.3 Hz, 1H), 7.24 (dd,  $J$  = 2.4, 0.6 Hz, 1H), 3.16 (s, 3H), 3.05 (s, 3H), 2.46 (s, 3H).

**<sup>13</sup>C NMR** (75 MHz,  $\text{cdCl}_3$ )  $\delta$  (ppm) 155.1, 148.7, 142.0, 137.3, 137.1, 134.6, 130.0 (2C), 129.8, 129.1(2C), 128.1, 126.4, 126.2, 125.5, 122.6, 118.0, 36.9, 36.6, 21.4.

**HRMS** (ESI)  $m/z$  calcd for  $\text{C}_{20}\text{H}_{19}\text{NO}_2$  ( $[\text{M}+\text{H}]^+$ ):306.1489, found: 306.1484.

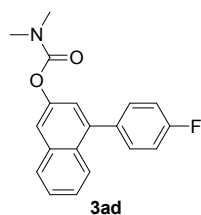

#### 4-(4-fluorophenyl)naphthalen-2-yl dimethylcarbamate (**3ad**)

The reaction was performed according to the general procedure for 14 hours. Flash chromatography (petroleum ether: dichloromethane=1:1) yielded the product **3ad** (213.4 mg, 69%), Colorless oil.

**<sup>1</sup>H NMR** (300 MHz,  $\text{cdCl}_3$ )  $\delta$  7.85 (d,  $J$  = 8.7 Hz, 1H), 7.81 (d,  $J$  = 8.7 Hz, 1H), 7.61 (d,  $J$  = 2.4 Hz, 1H), 7.51 – 7.37 (m, 4H), 7.22 (d,  $J$  = 2.1 Hz, 1H), 7.21 – 7.13 (m, 2H), 3.16 (s, 3H), 3.05 (s, 3H).

**<sup>13</sup>C NMR** (75 MHz,  $\text{cdCl}_3$ )  $\delta$ (ppm) 162.5 (d,  $^1J_{\text{C-F}}$ =245Hz), 155.1, 148.6, 140.7, 136.0 (d,  $^4J_{\text{C-F}}$ =3Hz), 134.5, 131.7 (d,  $^3J_{\text{C-F}}$  = 7.5 Hz, 2C), 129.7, 128.2, 126.5, 125.8, 125.7, 122.8, 118.3, 115.3(d,  $^2J_{\text{C-F}}$ =21Hz, 2C), 36.9, 36.6.

**HRMS** (ESI)  $m/z$  calcd for  $\text{C}_{19}\text{H}_{16}\text{FNO}_2$  ( $[\text{M}+\text{H}]^+$ ):310.1238, found: 310.1234.

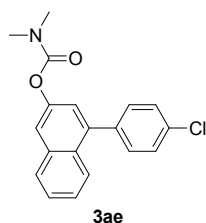

#### 4-(4-chlorophenyl)naphthalen-2-yl dimethylcarbamate (**3ae**)

The reaction was performed according to the general procedure for 17 hours. Flash chromatography (petroleum ether: dichloromethane=1:1) yielded the product **3ae** (224.8 mg, 69%), Colorless oil.

**<sup>1</sup>H NMR** (300 MHz,  $\text{cdCl}_3$ )  $\delta$  (ppm) 7.85 (d,  $J = 8.1$  Hz, 1H), 7.81 (d,  $J = 8.7$  Hz, 1H), 7.62 (d,  $J = 2.1$  Hz, 1H), 7.52 – 7.37 (m, 6H), 7.23 (d,  $J = 2.4$  Hz, 1H), 3.16 (s, 3H), 3.05 (s, 3H).

**<sup>13</sup>C NMR** (75 MHz,  $\text{cdCl}_3$ )  $\delta$  (ppm) 155.0, 148.6, 140.5, 138.5, 134.5, 133.7, 131.4 (2C), 129.5, 128.6 (2C), 128.2, 126.6, 125.8, 125.7, 122.7, 118.5, 36.9, 36.6.

**HRMS** (ESI)  $m/z$  calcd for  $\text{C}_{19}\text{H}_{16}\text{ClNO}_2$  ( $[\text{M}+\text{H}]^+$ ): 326.0942, found: 326.0942.

To confirm the structure of **3ae** is *meta*-arylated product again, we removed the carbamate group and procedure and the NMR data is shown below:

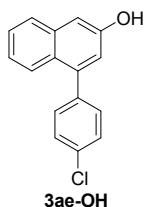

#### 4-(4-chlorophenyl)naphthalen-2-ol (**3ae-OH**)

To a flask added **3ae** (97.7 mg, 0.3 mmol), NaOH (120 mg, 3 mmol), EtOH (3ml), the mixture was refluxed over night, After that, the reaction mixture was diluted with  $\text{CH}_2\text{Cl}_2$  through celite and washed with water ( $1 \times 5$  ml). The aqueous phase was re-extracted with  $\text{CH}_2\text{Cl}_2$  ( $3 \times 5$  ml). The combined organic phase were dried over  $\text{Na}_2\text{SO}_4$  and concentrated under reduced pressure, the residue was purified by flash chromatography (petroleum ether: ethyl acetate=7:1) to afford the product **3ae-OH** (70.3 mg, 92%), pale purple oil.

**<sup>1</sup>H NMR** (300 MHz,  $\text{cdCl}_3$ )  $\delta$  7.76 – 7.72 (m, 2H), 7.49 – 7.38 (m, 5H), 7.32 – 7.26 (m, 1H), 7.19 (d,  $J = 2.4$  Hz, 1H), 7.04 (d,  $J = 2.4$  Hz, 1H), 4.36 (br, 1H).

**<sup>13</sup>C NMR** (75 MHz,  $\text{cdCl}_3$ )  $\delta$  152.7, 141.2, 138.6, 135.3, 133.7, 131.3 (2C), 128.6 (2C), 127.3, 127.1, 126.8, 125.9, 124.2, 118.9, 109.8.

**HRMS** (ESI)  $m/z$  calcd for  $\text{C}_{16}\text{H}_{11}\text{ClO}$  ( $[\text{M}+\text{H}]^+$ ): 255.0571, found: 255.0575.

The NMR data is consistent with that reported in the literature.<sup>1</sup>

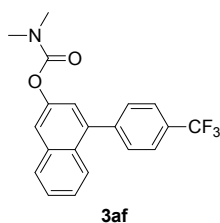

#### 4-(4-(trifluoromethyl)phenyl)naphthalen-2-yl dimethylcarbamate (**3af**)

The reaction was performed according to the general procedure for 9 hours. Flash chromatography (petroleum ether: dichloromethane=1:1) yielded the product **3af** (258.7 mg, 72%), white oil.

**<sup>1</sup>H NMR** (300 MHz, dmsO)  $\delta$  8.01 (d,  $J$  = 7.8 Hz, 1H), 7.91 (s, 1H), 7.89 (s, 1H), 7.77 (d,  $J$  = 2.4 Hz, 1H), 7.75 – 7.71 (m, 3H), 7.61 – 7.55 (m, 1H), 7.52 – 7.46 (m, 1H), 7.31 (d,  $J$  = 2.4 Hz, 1H), 3.10 (s, 3H), 2.94 (s, 3H).

**<sup>13</sup>C NMR** (75 MHz, cdCl<sub>3</sub>)  $\delta$  154.9, 148.6, 143.7, 140.1, 134.5, 130.4 (3C), 129.2, 128.2, 126.6, 126.0, 125.5 (2C), 125.3, 122.8, 118.9, 107.7, 36.8, 36.5.

**HRMS** (ESI)  $m/z$  calcd for C<sub>20</sub>H<sub>16</sub>F<sub>3</sub>NO<sub>2</sub> ([M+H]<sup>+</sup>):360.1206, found: 360.1205.

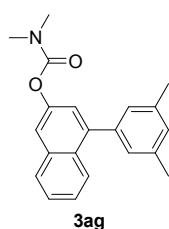

#### 4-(3,5-dimethylphenyl)naphthalen-2-yl dimethylcarbamate (**3ag**)

To a Schlenk tube under N<sub>2</sub> atmosphere added **1a** (215.2 mg, 1 mmol), (3, 5-dimethylphenyl) boronic acid (449.9 mg, 3 mmol), Pd(OAc)<sub>2</sub> (11.2 mg, 0.05 mmol), K<sub>2</sub>S<sub>2</sub>O<sub>8</sub> (1622 mg, 6 mmol), AgOAc (8.3 mg, 0.05 mmol), TFA (5ml). The mixture was stirred for 6 hours at room temperature under N<sub>2</sub>. Then the reaction mixture was neutralized with saturated K<sub>2</sub>CO<sub>3</sub> aqueous solution and extracted with CH<sub>2</sub>Cl<sub>2</sub> (20 ml  $\times$  3). The combined organic phase were dried over Na<sub>2</sub>SO<sub>4</sub> and concentrated under reduced pressure, the residue was purified by flash chromatography (petroleum ether: dichloromethane=1:1) to afford the product **3ag** (201.2 mg, 63%), Yellow oil.

**<sup>1</sup>H NMR** (300 MHz, dmsO)  $\delta$ (ppm) 7.96 (d,  $J$  = 7.8 Hz, 1H), 7.81 (d,  $J$  = 8.1 Hz, 1H), 7.68 (d,  $J$  = 2.4 Hz, 1H), 7.57 – 7.51 (m, 1H), 7.48 – 7.43 (m, 1H), 7.19 (d,  $J$  = 2.1 Hz, 1H), 7.10 (s, 1H), 7.07 (s, 2H), 3.09 (s, 3H), 2.94 (s, 3H), 2.35 (s, 6H).

**<sup>13</sup>C NMR** (75 MHz, cdCl<sub>3</sub>)  $\delta$ (ppm) 155.1, 148.6, 142.2, 139.9, 137.8 (2C), 134.5, 129.7, 129.1, 128.1, 127.9 (2C), 126.3 C, 126.3, 125.4, 122.4, 117.9, 36.8, 36.6, 21.4 (2C).

**HRMS** (ESI)  $m/z$  calcd for C<sub>21</sub>H<sub>21</sub>NO<sub>2</sub> ([M+H]<sup>+</sup>):320.1645, found: 320.1652.

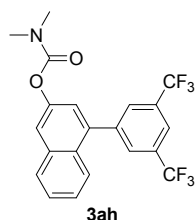

#### 4-(3,5-bis(trifluoromethyl)phenyl)naphthalen-2-yl dimethylcarbamate (**3ah**)

The reaction was performed according to the general procedure for 3 hours. Flash chromatography (petroleum ether: ethyl acetate=10:1) yielded the product **3ah** (306.2 mg, 71%), White solid, mp.92-93°C.

**<sup>1</sup>H NMR** (300 MHz, dmso)  $\delta$ (ppm) 8.25 (s, 1H), 8.17 (s, 2H), 8.03 (d,  $J$  = 8.4 Hz, 1H), 7.83 (d,  $J$  = 1.8 Hz, 1H), 7.67 – 7.58 (m, 2H), 7.56 – 7.50 (m, 1H), 7.45 (d,  $J$  = 2.4 Hz, 1H), 3.11 (s, 3H), 2.95 (s, 3H).

**<sup>13</sup>C NMR** (75 MHz, cdcl<sub>3</sub>)  $\delta$ (ppm) 155.0, 148.6, 142.2, 138.4, 134.7, 132.2, 131.7, 130.3 (2C), 129.1, 128.6, 127.0 (2C), 126.6, 124.9, 123.3, 121.6 (2C), 119.7, 36.9, 36.7.

**HRMS** (ESI)  $m/z$  calcd for C<sub>21</sub>H<sub>15</sub>F<sub>6</sub>NO<sub>2</sub> ([M+H]<sup>+</sup>):428.1080, found: 428.1081.

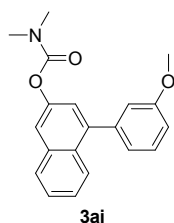

#### 4-(3-methoxyphenyl)naphthalen-2-yl dimethylcarbamate (3ai)

To a Schlenk tube under N<sub>2</sub> atmosphere added 2-naphthyl dimethylcarbamate (215.2 mg, 1 mmol), (3-methoxyphenyl) boronic acid (455.9 mg, 3 mmol), Pd(OAc)<sub>2</sub> (11.2 mg, 0.05 mmol), K<sub>2</sub>S<sub>2</sub>O<sub>8</sub> (1622 mg, 6 mmol), AgOAc (8.3 mg, 0.05 mmol), TFA (5ml). The mixture was stirred for 8 hours at room temperature under N<sub>2</sub>. Then the reaction mixture was neutralized with saturated K<sub>2</sub>CO<sub>3</sub> aqueous solution and extracted with CH<sub>2</sub>Cl<sub>2</sub> (20 ml × 3). The combined organic phase were dried over Na<sub>2</sub>SO<sub>4</sub> and concentrated under reduced pressure. The residue was purified by flash chromatography (petroleum ether: dichloromethane=1:1) to afford the product **3ai** (202.5 mg, 63%), White oil.

**<sup>1</sup>H NMR** (300 MHz, cdcl<sub>3</sub>)  $\delta$ (ppm) 7.89 (d,  $J$  = 8.4 Hz, 1H), 7.84 (d,  $J$  = 7.5 Hz, 1H), 7.60 (d,  $J$  = 2.1 Hz, 1H), 7.50 – 7.45 (m, 1H), 7.41 – 7.36 (m, 2H), 7.24 (d,  $J$  = 2.4 Hz, 1H), 7.10 – 7.07 (m, 1H), 7.05 – 7.04 (m, 1H), 6.99 – 6.95 (m, 1H), 3.85 (s, 3H), 3.15 (s, 3H), 3.05 (s, 3H).

**<sup>13</sup>C NMR** (75 MHz, cdcl<sub>3</sub>)  $\delta$  (ppm) 159.6, 155.1, 148.6, 141.7, 141.4, 134.5, 129.6, 129.3, 128.1, 126.4, 126.1, 125.6, 122.6, 122.5, 118.2, 115.5, 113.3, 55.4, 36.8, 36.6.

**HRMS** (ESI)  $m/z$  calcd for C<sub>20</sub>H<sub>19</sub>NO<sub>3</sub> ([M+H]<sup>+</sup>):322.1438, found: 322.1436.

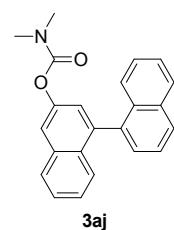

#### [1,1'-binaphthalen]-3-yl dimethylcarbamate (3aj)

The reaction was performed according to the general procedure for 4 hours. Flash chromatography (petroleum ether: dichloromethane=1:1) yielded the product **3aj** (200.5 mg, 59%), yellow oil.

**<sup>1</sup>H NMR** (300 MHz, dmso)  $\delta$ (ppm) 8.08 – 8.01 (m, 3H), 7.82 (d,  $J$  = 2.1 Hz, 1H), 7.69 – 7.64 (m, 1H), 7.56 – 7.49 (m, 3H), 7.39 – 7.30 (m, 3H), 7.24 – 7.17 (m, 2H), 3.09 (s, 3H), 2.93 (s, 3H).



**<sup>13</sup>C NMR** (75 MHz, cdcl<sub>3</sub>) δ(ppm) 155.1, 148.8, 140.2, 137.7, 134.3, 133.7, 132.9, 130.9, 128.3 (2C), 128.1, 128.0, 126.7, 126.7, 126.5, 126.3, 126.0, 125.6, 125.4, 123.6, 118.5, 36.9, 36.7.

**HRMS** (ESI) m/z calcd for C<sub>23</sub>H<sub>19</sub>NO<sub>2</sub> ([M+H]<sup>+</sup>):342.1489, found: 342.1485.

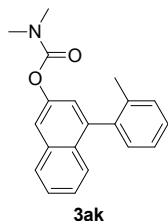

#### 4-(o-tolyl)naphthalen-2-yl dimethylcarbamate (**3ak**)

The reaction was performed according to the general procedure for 36 hours. Flash chromatography (petroleum ether: dichloromethane=1:1) yielded the product **3ak** (201.5 mg, 66%), Colorless oil.

**<sup>1</sup>H NMR** (300 MHz, cdcl<sub>3</sub>) δ 7.88 (d, *J* = 8.4 Hz, 1H), 7.66 (d, *J* = 2.4 Hz, 1H), 7.51 – 7.46 (m, 2H), 7.38 – 7.29 (m, 5H), 7.21 (d, *J* = 2.1 Hz, 1H), 3.16 (s, 3H), 3.07 (s, 3H), 2.09 (s, 3H).

**<sup>13</sup>C NMR** (75 MHz, cdcl<sub>3</sub>) δ 154.9, 148.6, 141.3, 139.4, 136.7, 134.1, 130.3, 129.9 (2C), 128.0, 127.8, 126.3, 126.0, 125.6, 125.5, 122.4, 117.8, 36.7, 36.5, 20.1.

**HRMS** (ESI) m/z calcd for C<sub>20</sub>H<sub>19</sub>NO<sub>2</sub> ([M+H]<sup>+</sup>):306.1489, found: 306.1487.

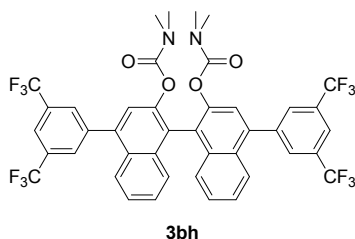

#### 4,4'-bis(3,5-bis(trifluoromethyl)phenyl)-[1,1'-binaphthalene]-2,2'-diyl bis(dimethylcarbamate) (**3bh**)

To a Schlenk tube under N<sub>2</sub> atmosphere added [1, 1'-binaphthalene]-2, 2'-diyl bis (dimethylcarbamate) (85.7 mg, 0.2 mmol), (3, 5-bis (trifluoromethyl) phenyl) boronic acid (305.5 mg, 1.2 mmol), Pd(OAc)<sub>2</sub> (4.5 mg, 0.02 mmol), K<sub>2</sub>S<sub>2</sub>O<sub>8</sub> (324.4 mg, 1.2 mmol), AgOAc (1.7 mg, 0.01 mmol), TFA (0.6ml). The mixture was stirred for 36 hours at room temperature under N<sub>2</sub>. Then the reaction mixture was neutralized with saturated K<sub>2</sub>CO<sub>3</sub> aqueous solution and extracted with CH<sub>2</sub>Cl<sub>2</sub> (3 × 5 ml). The combined organic phase were dried over Na<sub>2</sub>SO<sub>4</sub> and concentrated under reduced pressure, the residue was purified by flash chromatography (petroleum ether: ethyl acetate=15:1) to afford the product **3bh** (68.2 mg, 40%), White oil.

**<sup>1</sup>H NMR** (300 MHz, cdcl<sub>3</sub>) δ(ppm) 8.10 (s, 4H), 8.06 (s, 2H), 7.99 (d, *J* = 8.1 Hz, 2H), 7.88 (s, 2H), 7.56 – 7.50 (m, 2H), 7.39 (s, 4H), 2.38 (brs, 12H).

**<sup>13</sup>C NMR** (75 MHz, cdcl<sub>3</sub>) δ(ppm) 153.1 (2C), 145.1 (2C), 140.7 (2C), 133.6 (2C), 132.5 (2C), 132.1 (2C), 131.6 (2C), 130.5 (2C), 129.4 (4C), 128.2 (2C), 127.6 (2C), 126.7 (4C), 125.4 (2C), 121.8 (2C), 121.2 (4C), 118.2 (2C), 36.2 (2C), 35.7 (2C).

**HRMS** (ESI) m/z calcd for C<sub>42</sub>H<sub>28</sub>F<sub>12</sub>N<sub>2</sub>O<sub>2</sub> ([M+H]<sup>+</sup>):853.1930, found: 853.1932.

Since the chemical shifts around 118 and  $\delta$  122 ppm which are assigned to *ortho*-sites of carbamate group exist in all the above examples, we can confirm the structure are not *ortho*-arylated.

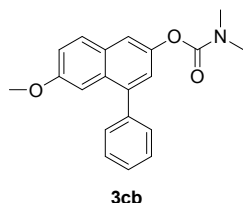

### 6-methoxy-4-phenylnaphthalen-2-yl dimethylcarbamate (**3cb**)

The reaction was performed according to the general procedure for 5 hours. Flash chromatography (petroleum ether: dichloromethane=1:3) yielded the product **3cb** (189.2 mg, 59%), White solid, mp.106-107°C.

**<sup>1</sup>H NMR** (300 MHz,  $\text{cdCl}_3$ )  $\delta$ (ppm) 7.75 (d,  $J$  = 8.7 Hz, 1H), 7.55 – 7.39 (m, 6H), 7.22 (s, 1H), 7.21 (s, 1H), 7.17 (dd,  $J$  = 8.7, 2.4 Hz, 1H), 3.75 (s, 3H), 3.15 (s, 3H), 3.05 (s, 3H).

**<sup>13</sup>C NMR** (75 MHz,  $\text{cdCl}_3$ )  $\delta$ (ppm) 157.6, 155.3, 147.1, 140.5, 140.3, 130.7, 129.9 (2C), 129.8, 129.6, 128.5 (2C), 127.5, 123.1, 118.9, 118.1, 104.8, 55.3, 36.8, 36.6.

**HRMS** (ESI)  $m/z$  calcd for  $\text{C}_{20}\text{H}_{19}\text{NO}_3$  ( $[\text{M}+\text{H}]^+$ ):322.1438, found: 322.1438.

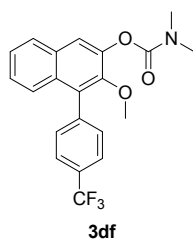

### 3-methoxy-4-(4-(trifluoromethyl)phenyl)naphthalen-2-yl dimethylcarbamate (**3df**)

To a Schlenk tube under  $\text{N}_2$  atmosphere added 3-methoxy-2-naphthyl dimethylcarbamate (245.3 mg, 1 mmol), (4-(trifluoromethyl)phenyl) boronic acid (569.8 mg, 3 mmol),  $\text{Pd}(\text{OAc})_2$  (11.2 mg, 0.05 mmol),  $\text{K}_2\text{S}_2\text{O}_8$  (1622 mg, 6 mmol),  $\text{AgOAc}$  (8.3 mg, 0.05 mmol), TFA (5ml). The mixture was stirred for 9 hours at 50°C under  $\text{N}_2$ . Then the reaction mixture was neutralized with saturated  $\text{K}_2\text{CO}_3$  aqueous solution and extracted with  $\text{CH}_2\text{Cl}_2$  (20 ml  $\times$  3). The combined organic phase were dried over  $\text{Na}_2\text{SO}_4$  and concentrated under reduced pressure, the residue was purified by flash chromatography (petroleum ether: dichloromethane=1:1) to afford the product **3df** (194.7 mg, 50%), yellow oil.

**<sup>1</sup>H NMR** (300 MHz,  $\text{cdCl}_3$ )  $\delta$  7.95 – 7.92 (m, 1H), 7.84 – 7.70 (m, 5H), 7.66 (dd,  $J$  = 8.4, 1.8 Hz, 1H), 7.60 – 7.57 (m, 1H), 7.22 (s, 1H), 3.98 (s, 3H), 3.19 (s, 3H), 3.05 (s, 3H).

**<sup>13</sup>C NMR** (75 MHz,  $\text{cdCl}_3$ )  $\delta$  154.9, 151.9, 144.9, 142.0, 135.5, 132.2, 130.4, 128.9, 128.3, 127.8, 127.6 (2C), 127.5, 125.9 (2C), 125.3, 121.3, 107.2, 56.2, 37.0, 36.9.

**HRMS** (ESI)  $m/z$  calcd for  $\text{C}_{21}\text{H}_{18}\text{F}_3\text{NO}_3$  ( $[\text{M}+\text{H}]^+$ ):390.1312, found: 390.1314.

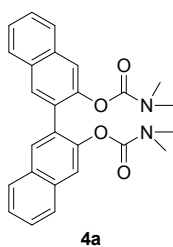

### [2,2'-binaphthalene]-3,3'-diyl bis(dimethylcarbamate) (**4a**)

The reaction was performed according to the general procedure without aryl boronic acid for 2 hours. Flash chromatography (petroleum ether: ethyl acetate=3:1) yielded the product **4a** (321.3 mg, 75%), Colorless oil.

**<sup>1</sup>H NMR** (300 MHz,  $\text{cdCl}_3$ )  $\delta$  7.87 – 7.84 (m, 6H), 7.80 (s, 2H), 7.54 – 7.45 (m, 4H), 2.78 (s, 6H), 2.68 (s, 6H).

**<sup>13</sup>C NMR** (75 MHz,  $\text{cdCl}_3$ )  $\delta$  154.4, 147.6, 133.7, 131.2, 130.9, 130.6, 128.0, 127.7, 126.6, 125.7, 119.3, 36.7, 36.2.

**HRMS** (ESI)  $m/z$  calcd for  $\text{C}_{26}\text{H}_{24}\text{N}_2\text{O}_4$  ( $[\text{M}+\text{H}]^+$ ):429.4872, found: 429.4875.

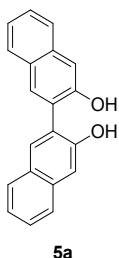

### [2,2'-binaphthalene]-3,3'-diol (**5a**)

To a flask added **4a** (321.3 mg, 0.75 mmol), NaOH (300mg, 7.5 mmol), EtOH (7.5ml), the mixture was refluxed over night, After that, the reaction mixture was diluted with  $\text{CH}_2\text{Cl}_2$  through celite and washed with water ( $1 \times 5 \text{ ml}$ ). The aqueous phase was re-extracted with  $\text{CH}_2\text{Cl}_2$  ( $3 \times 5 \text{ ml}$ ). The combined organic phase were dried over  $\text{Na}_2\text{SO}_4$  and concentrated under reduced pressure, the residue was purified by flash chromatography (petroleum ether: ethyl acetate=3:1) to afford the product **5a** (189 mg, 88%), White solid, mp.180-182°C.

**<sup>1</sup>H NMR** (300 MHz,  $\text{cdCl}_3$ )  $\delta$  7.87 (s, 2H), 7.82 (d,  $J = 8.1 \text{ Hz}$ , 2H), 7.78 (d,  $J = 8.1 \text{ Hz}$ , 2H), 7.53 – 7.47 (m, 2H), 7.43 (s, 2H), 7.43 – 7.37 (m, 2H), 5.58 (br, 2H).

**<sup>13</sup>C NMR** (75 MHz,  $\text{cdCl}_3$ )  $\delta$  151.4, 135.1, 131.3, 129.4, 128.1, 127.2, 126.6, 126.0, 124.6, 111.6.

**HRMS** (ESI)  $m/z$  calcd for  $\text{C}_{20}\text{H}_{14}\text{O}_2$  ( $[\text{M}+\text{H}]^+$ ):287.3314, found: 287.3310.

The NMR data is consistent with that reported in the literature.<sup>2</sup>

### References

- [1] K. Okuma, R. Itoyama, A. Sou, N. Nagahora, K. Shioj, *Chem. Commun.*, 2012, **48**, 11145–11147.
- [2] T. Okamoto, C. Mitsui, M. Yamagishi, K. Nakahara, J. Soeda, Y. Hirose, K. Miwa, H. Sato, A. Yamano, T. Matsushita, T. Uemura, J. Takeya, *Adv. Mater.*, 2013, **25**, 6392–6397.

(E) Copies of  $^1\text{H}$  and  $^{13}\text{C}$  spectra

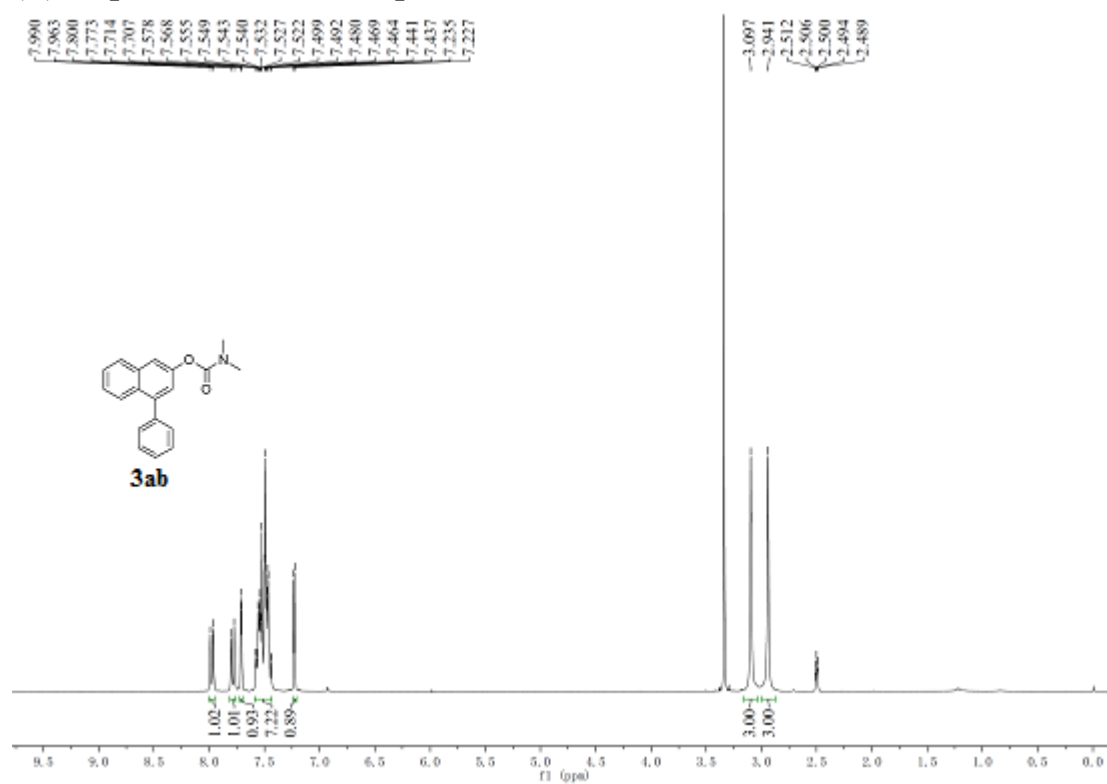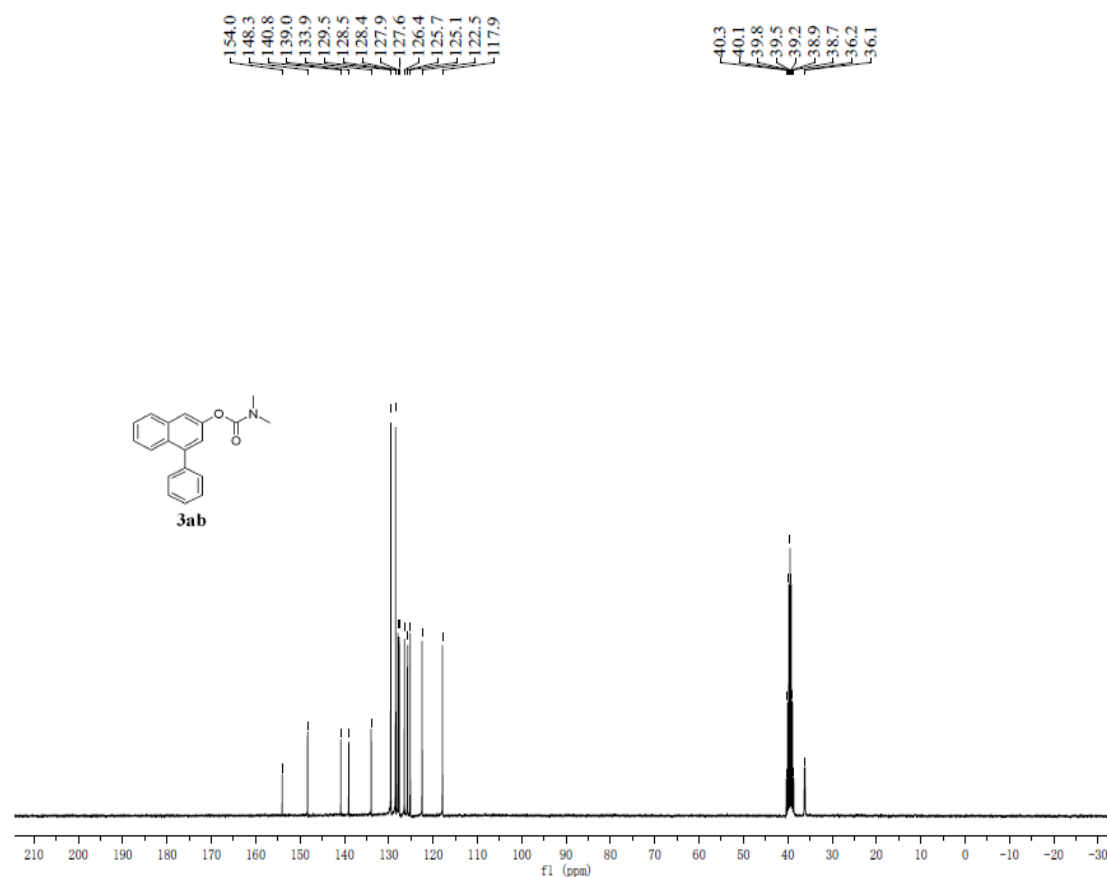

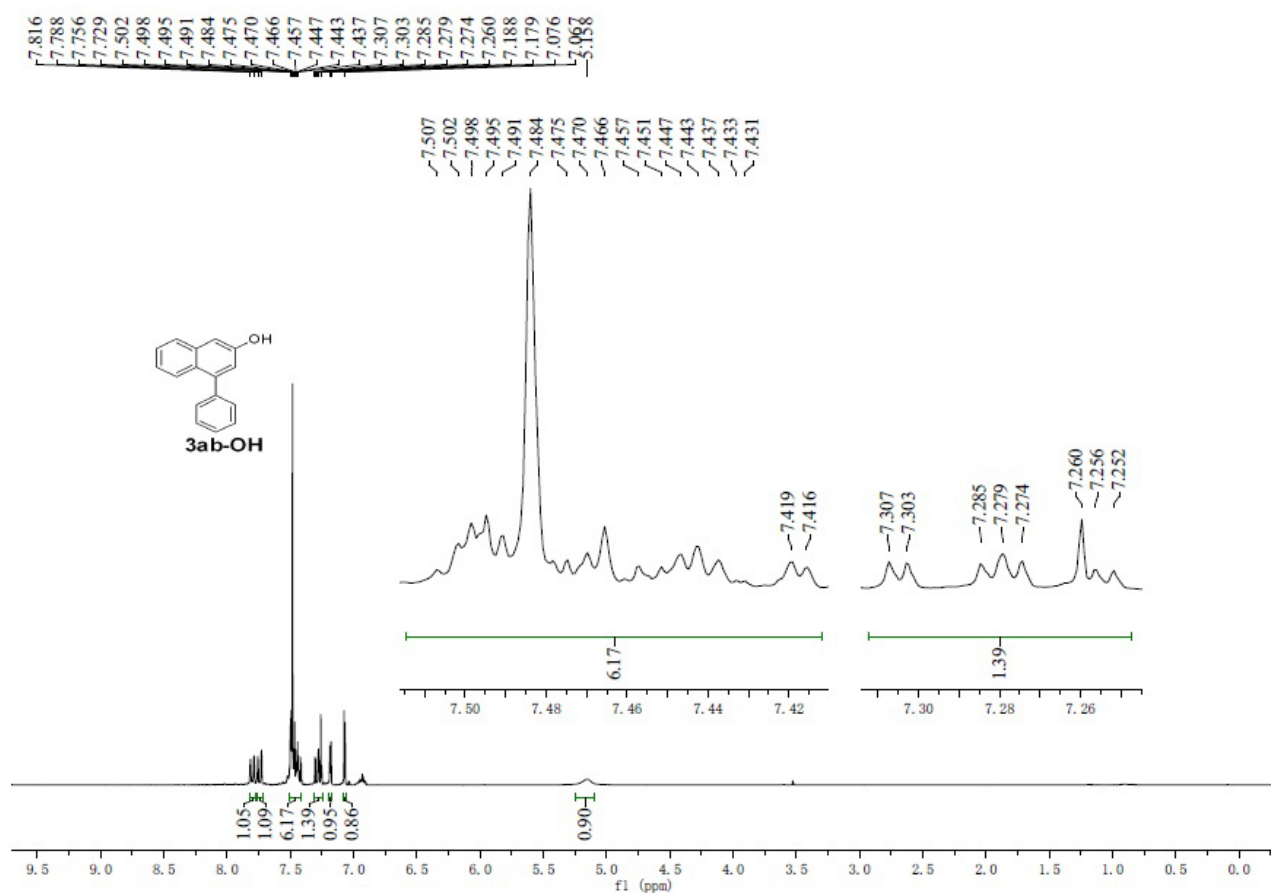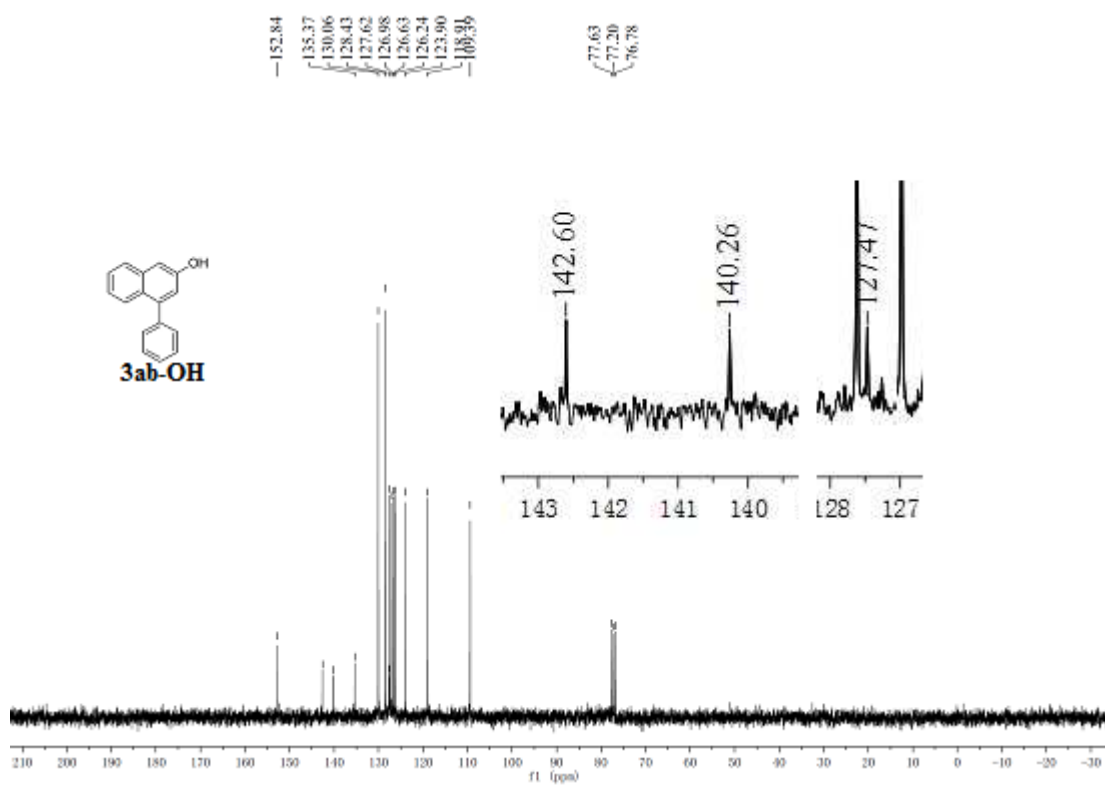

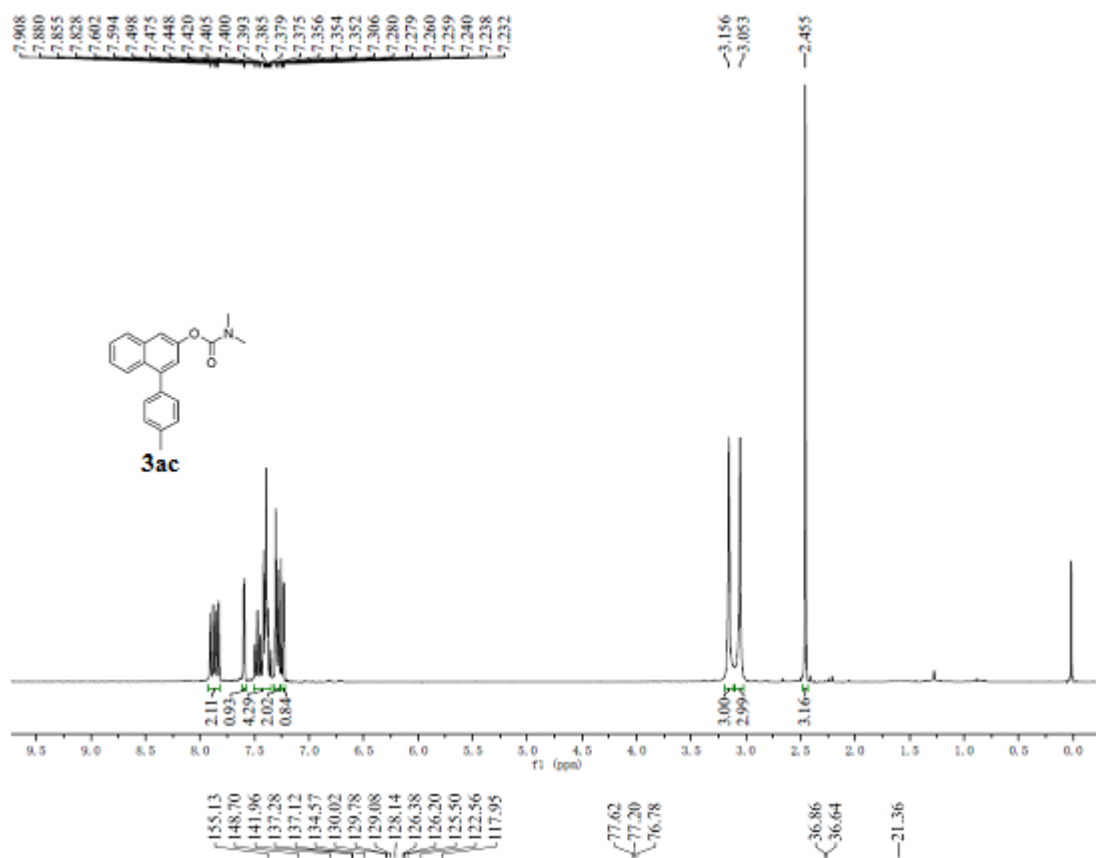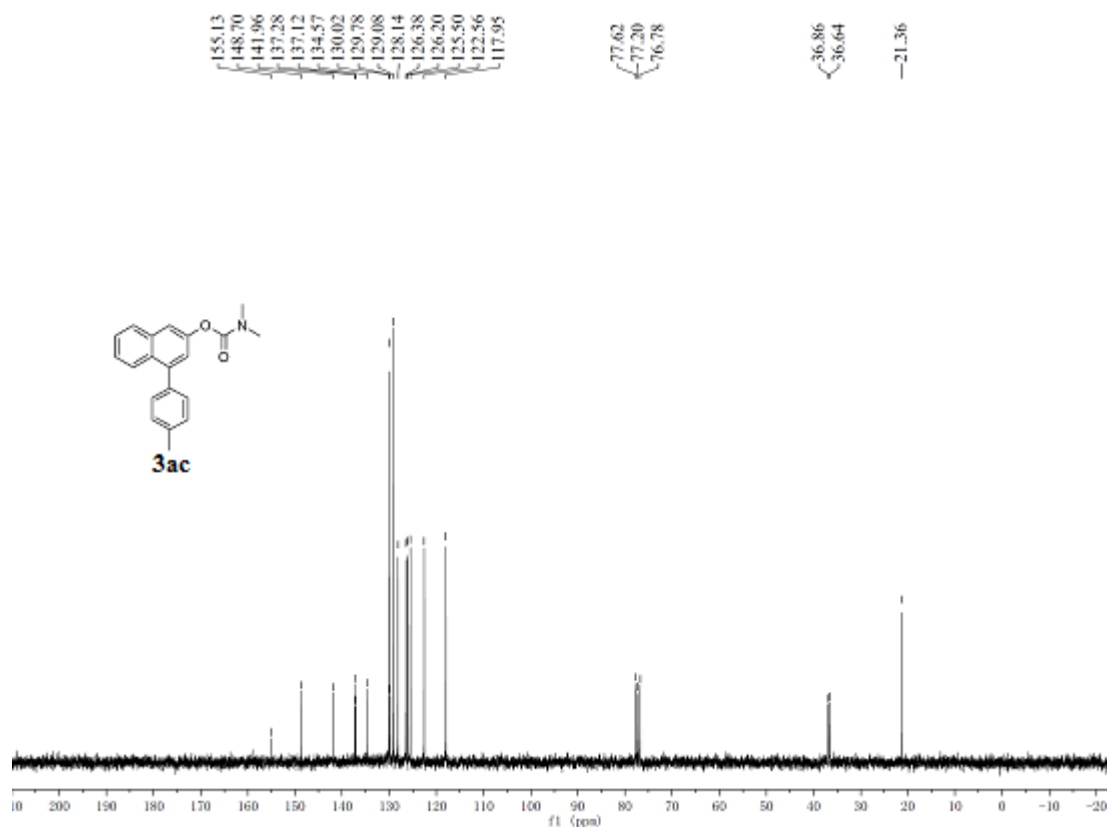

7.866  
7.837  
7.825  
7.796  
7.614  
7.606  
7.514  
7.510  
7.490  
7.483  
7.472  
7.468  
7.461  
7.450  
7.443  
7.433  
7.423  
7.419  
7.401  
7.395  
7.391  
7.373  
7.368  
7.260  
7.229  
7.222  
7.210  
7.200  
7.193  
7.178  
7.171  
7.164  
7.149  
7.142  
7.132

3.159  
3.053

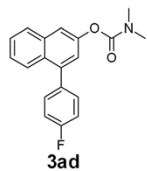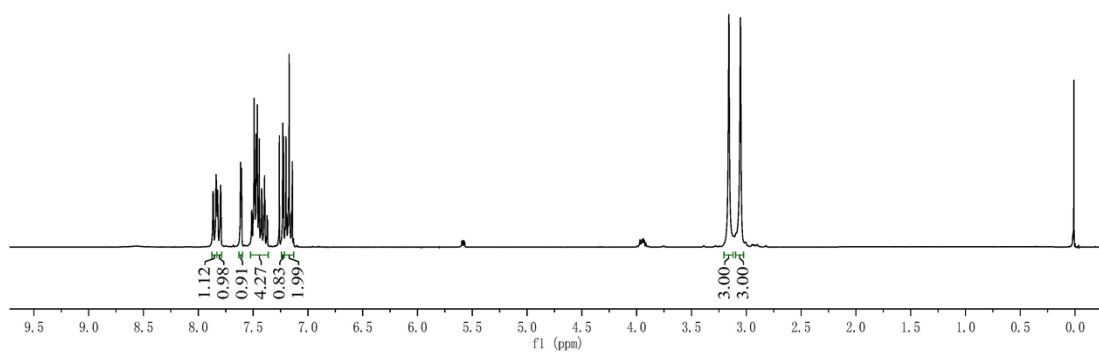

164.14  
160.87  
155.07  
148.62  
140.73  
135.99  
135.95  
134.54  
131.75  
131.65  
129.67  
128.22  
126.52  
125.84  
125.74  
122.78  
118.32  
115.46  
115.18

77.62  
77.20  
76.78

36.86  
36.63

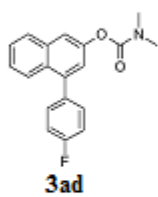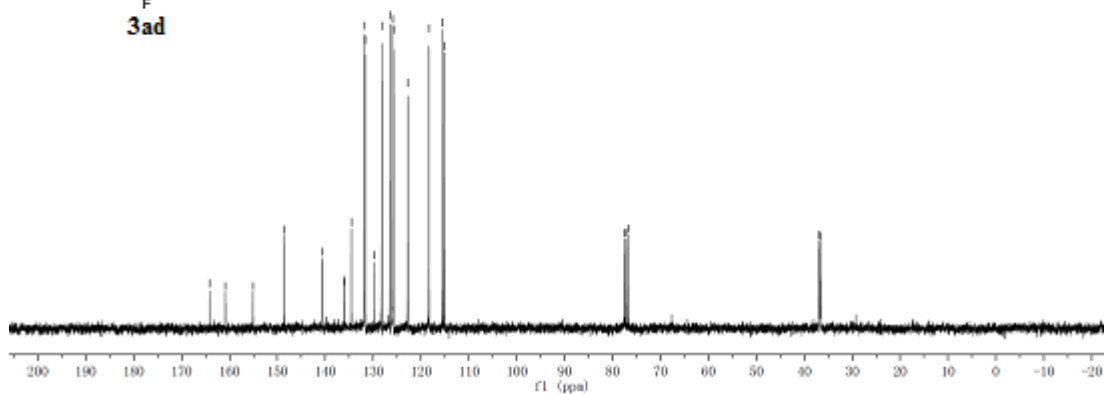

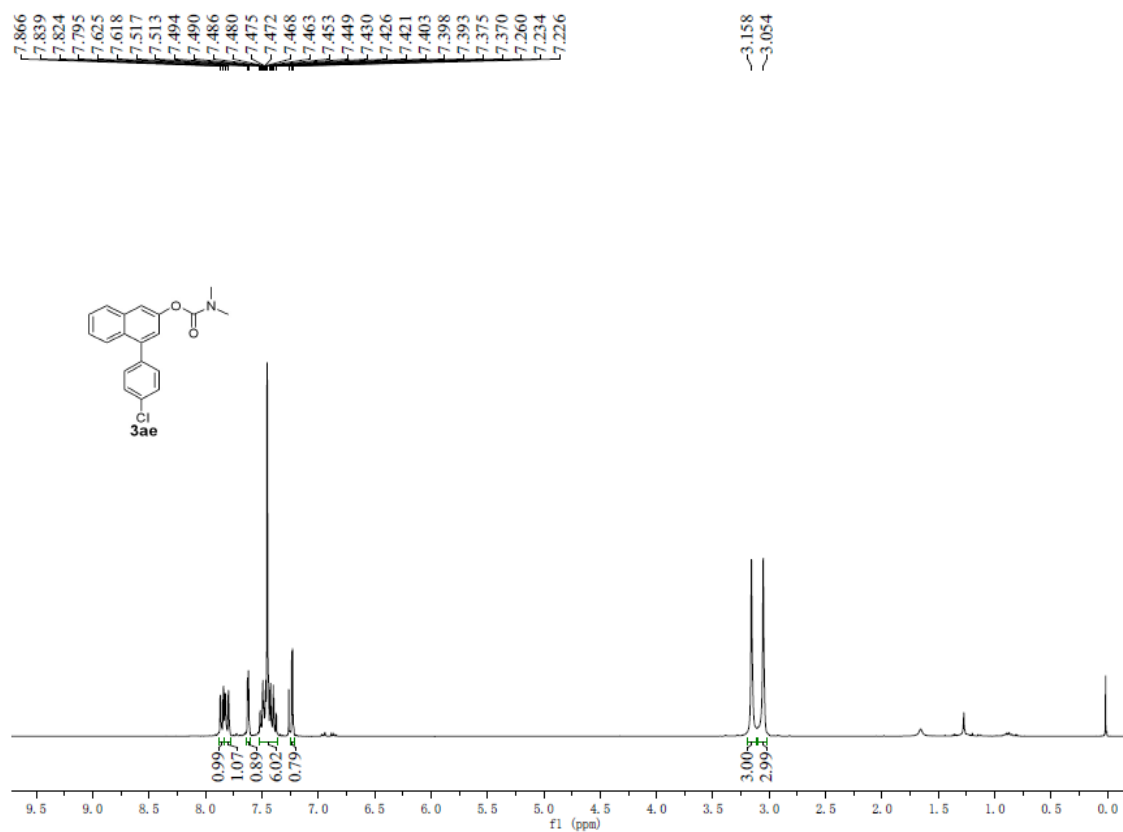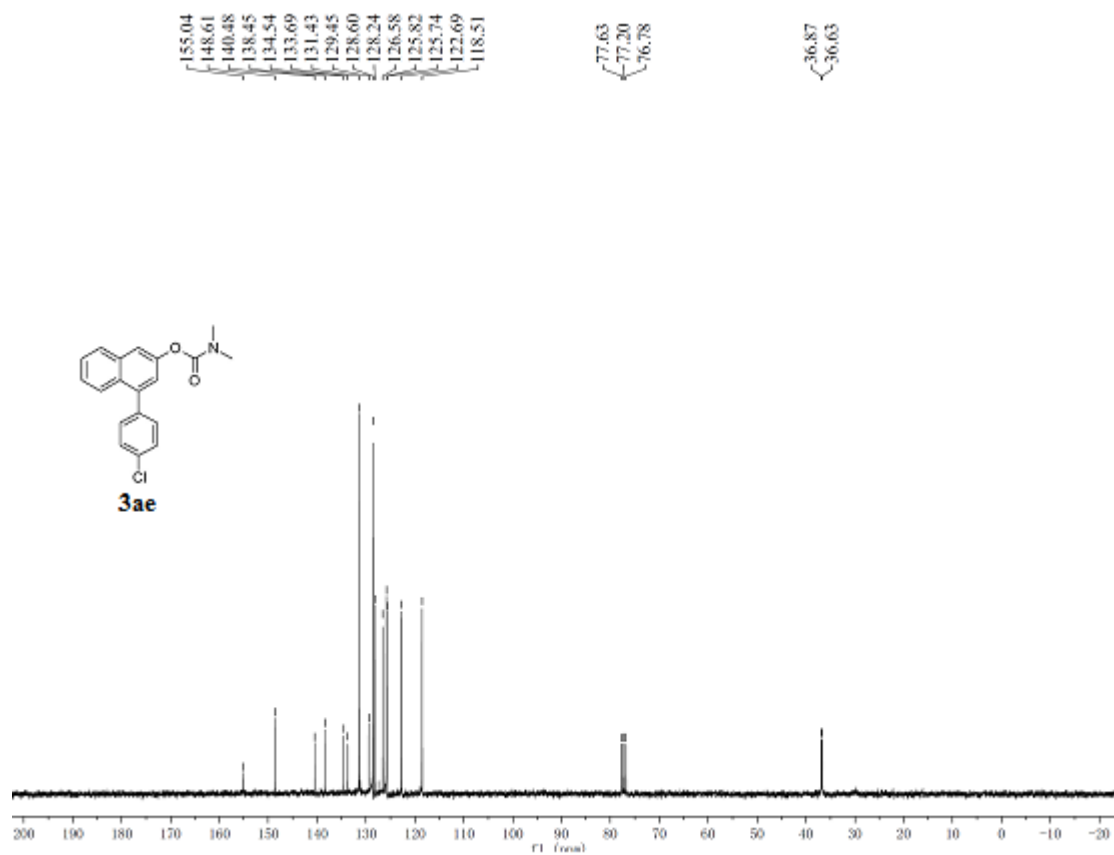



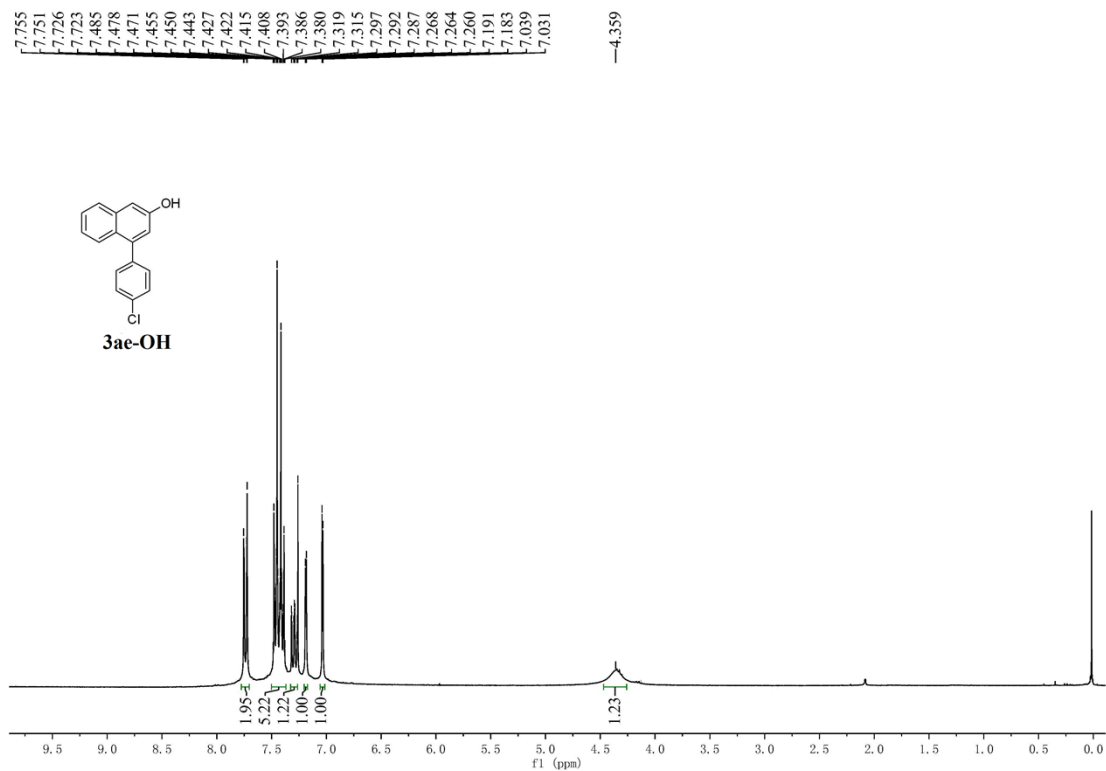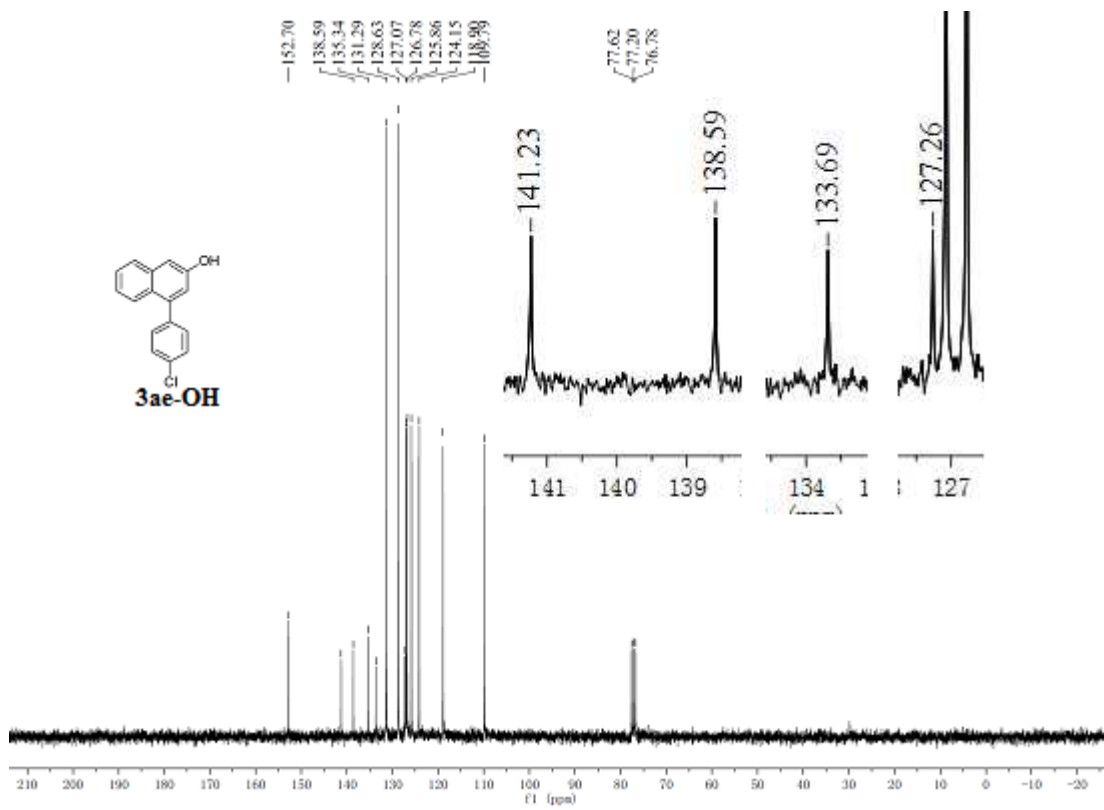

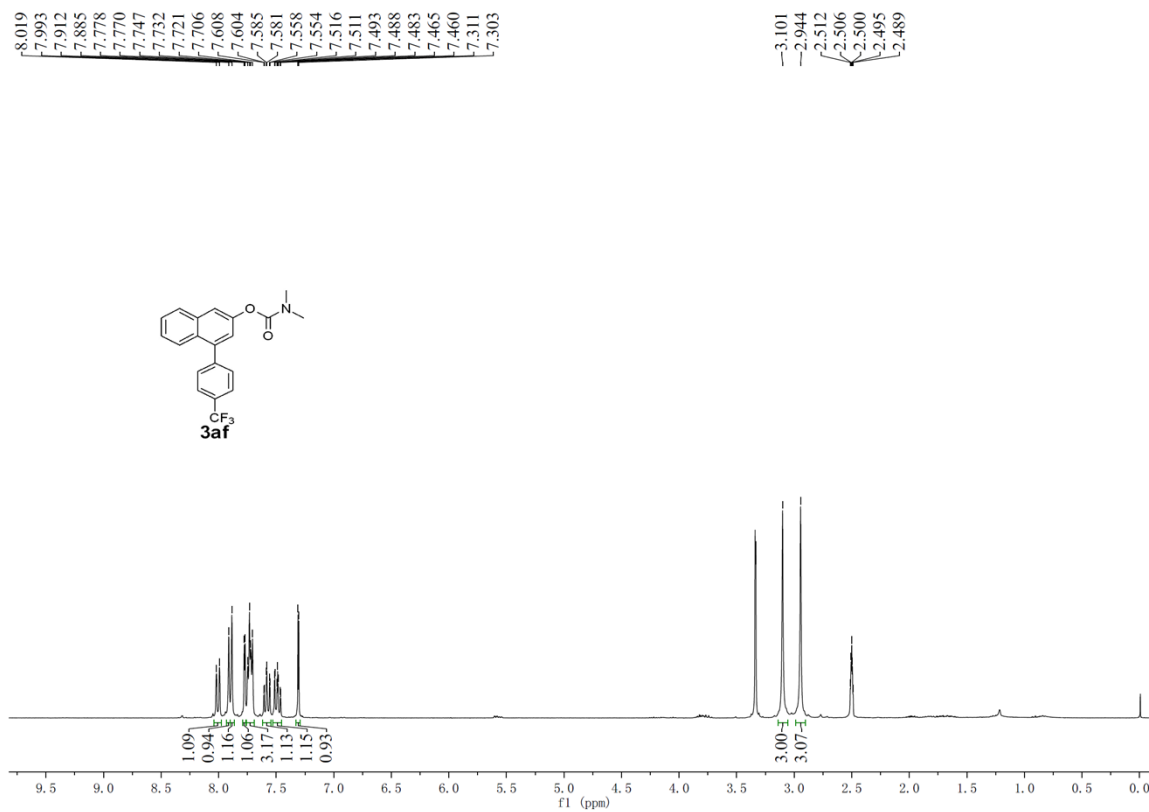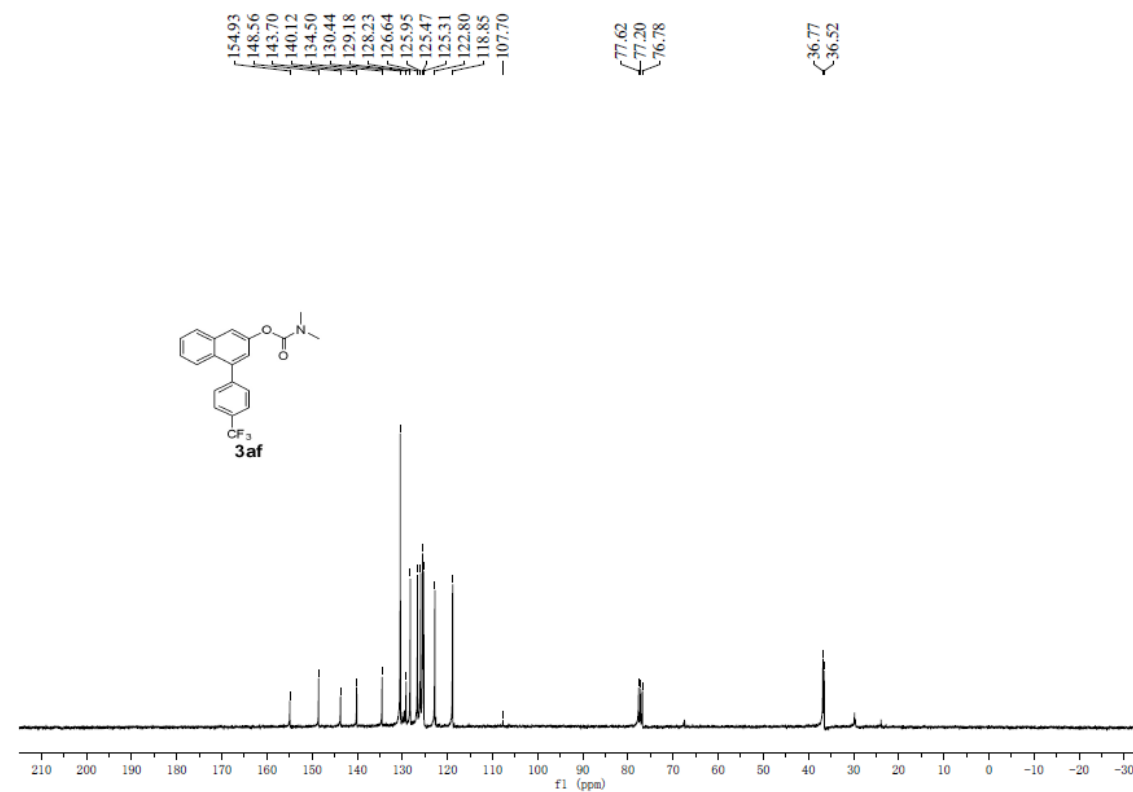

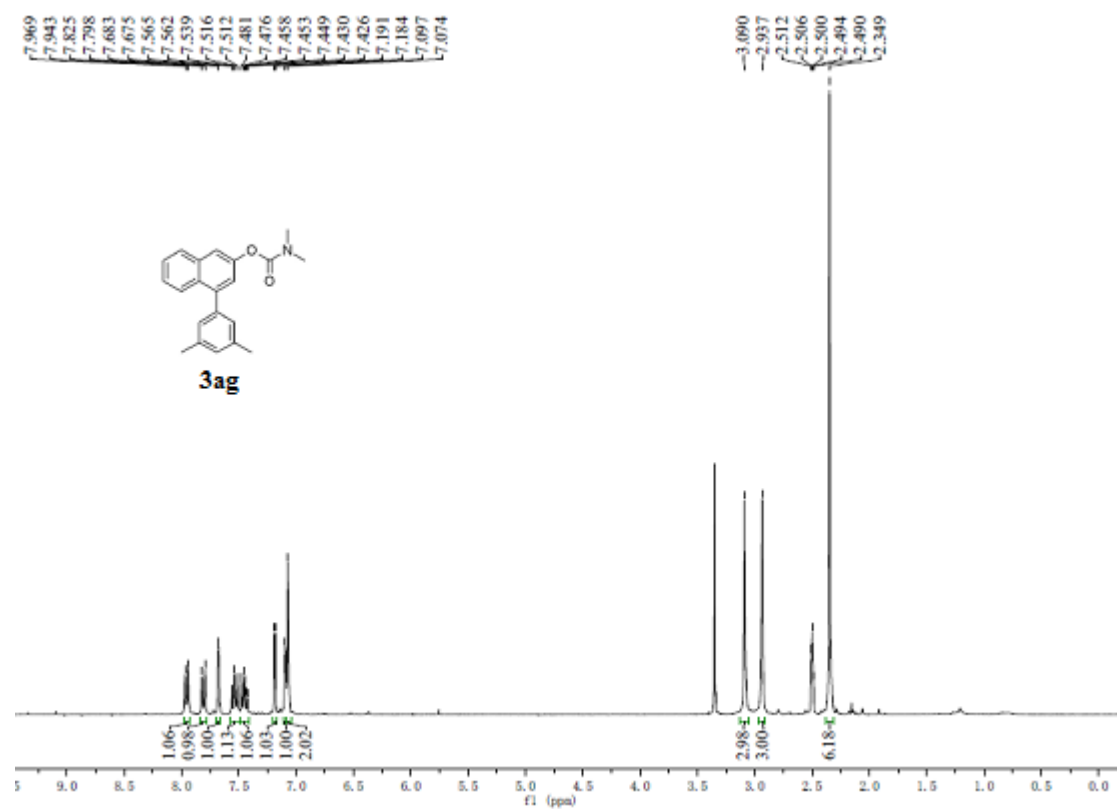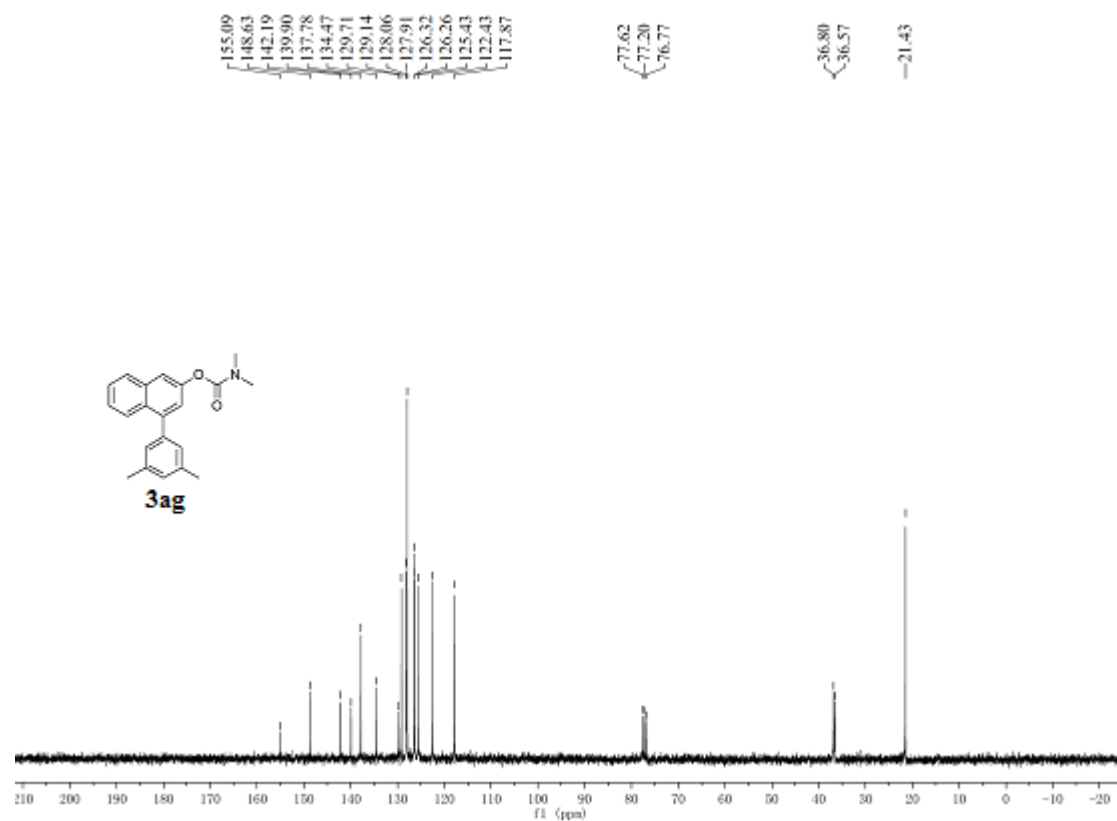

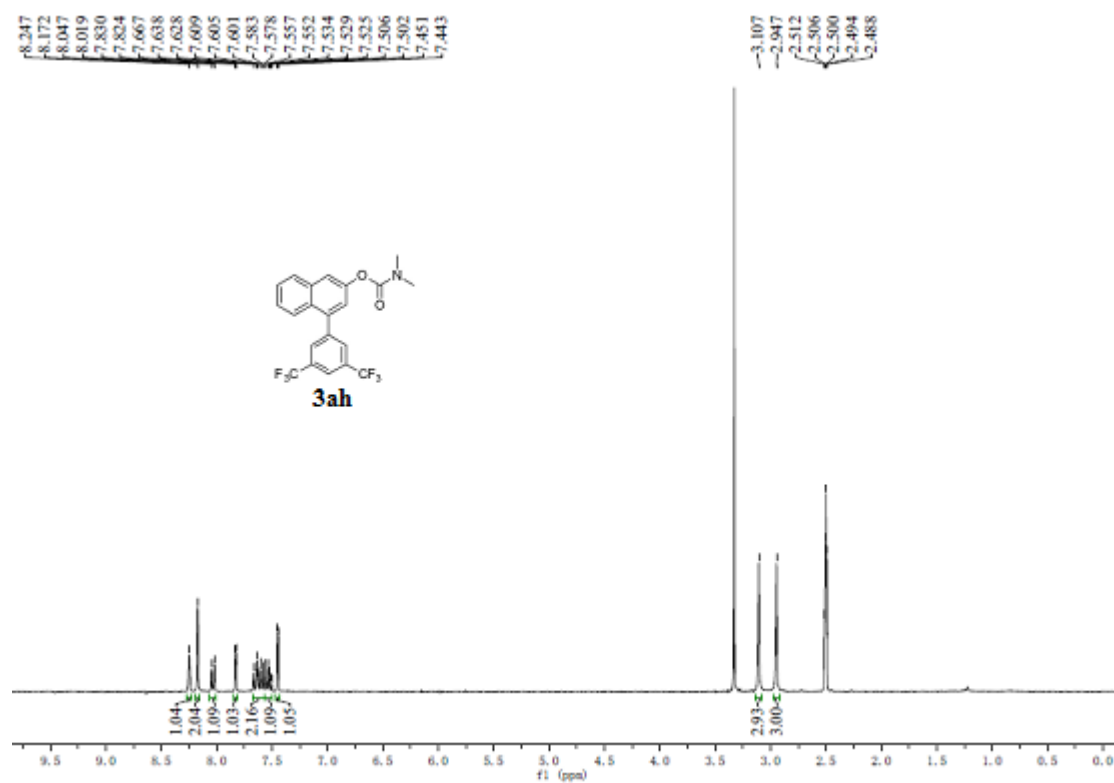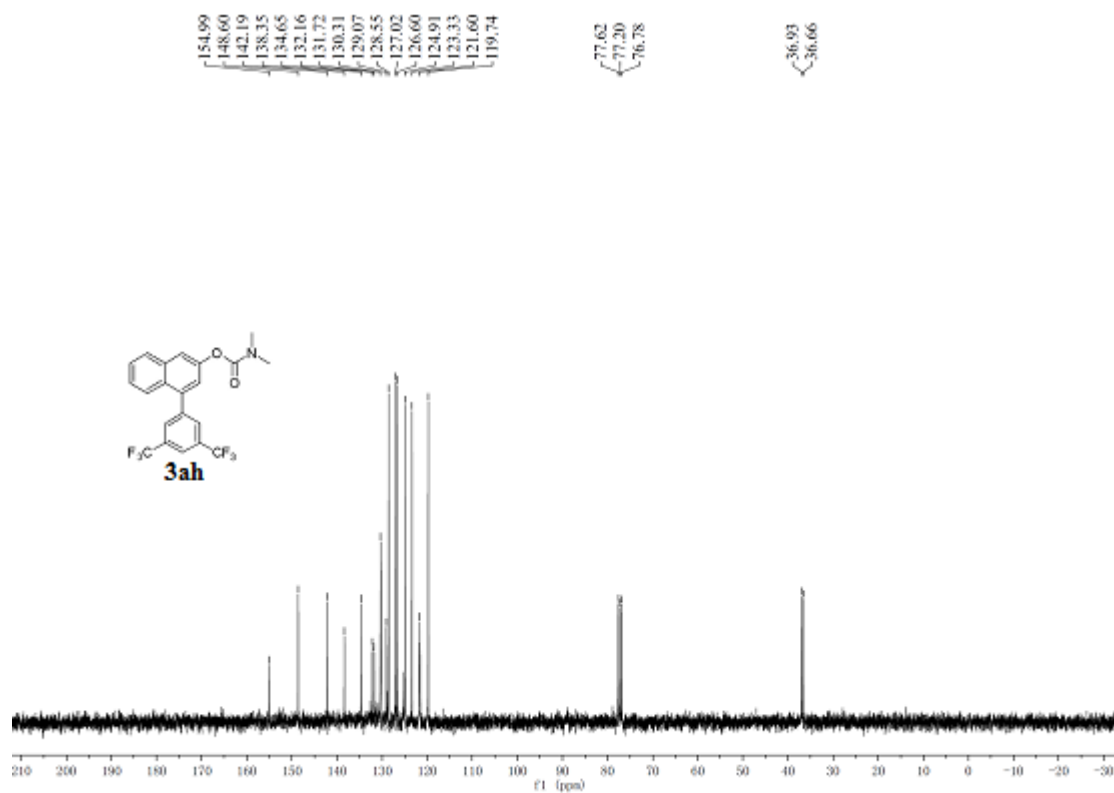

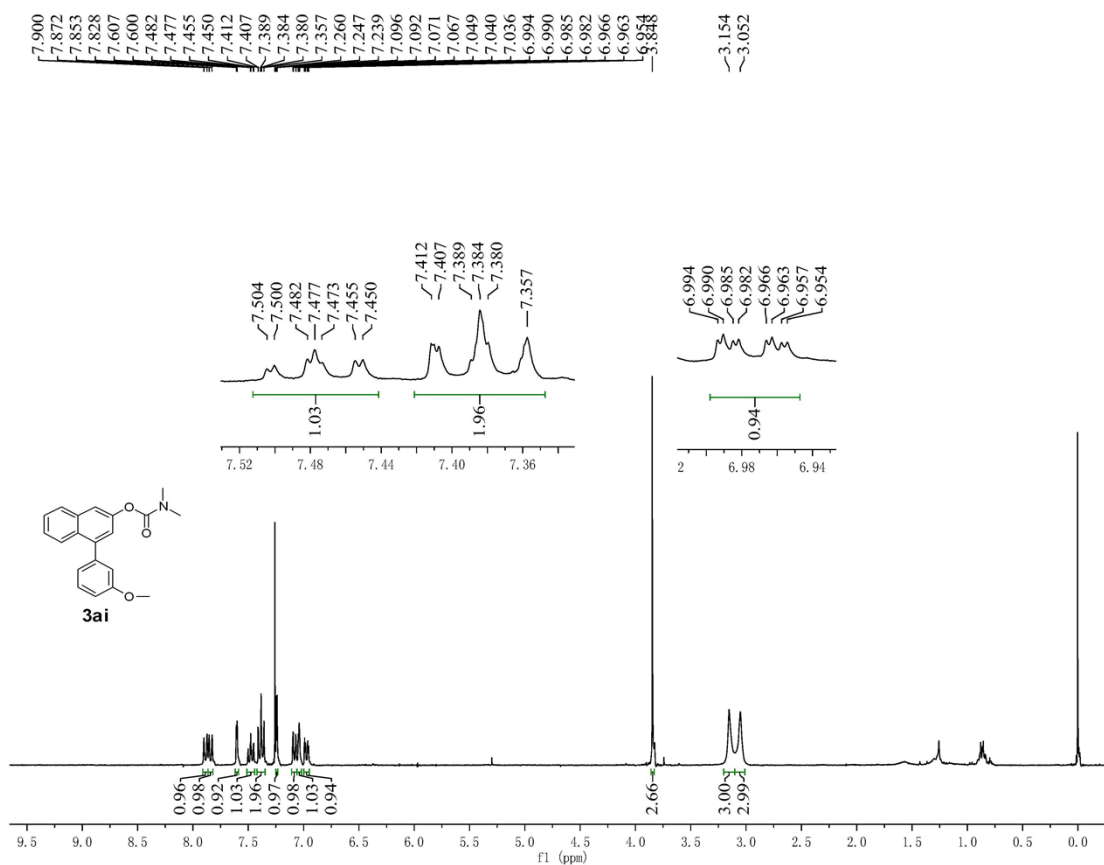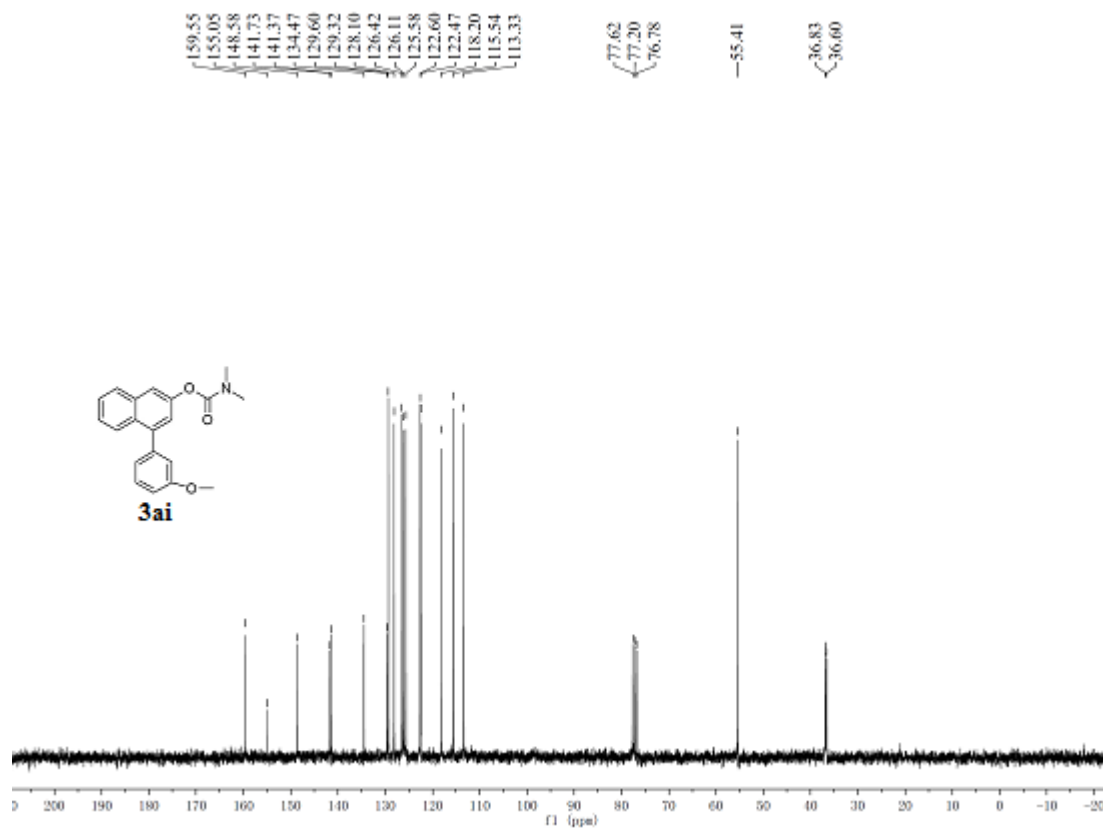

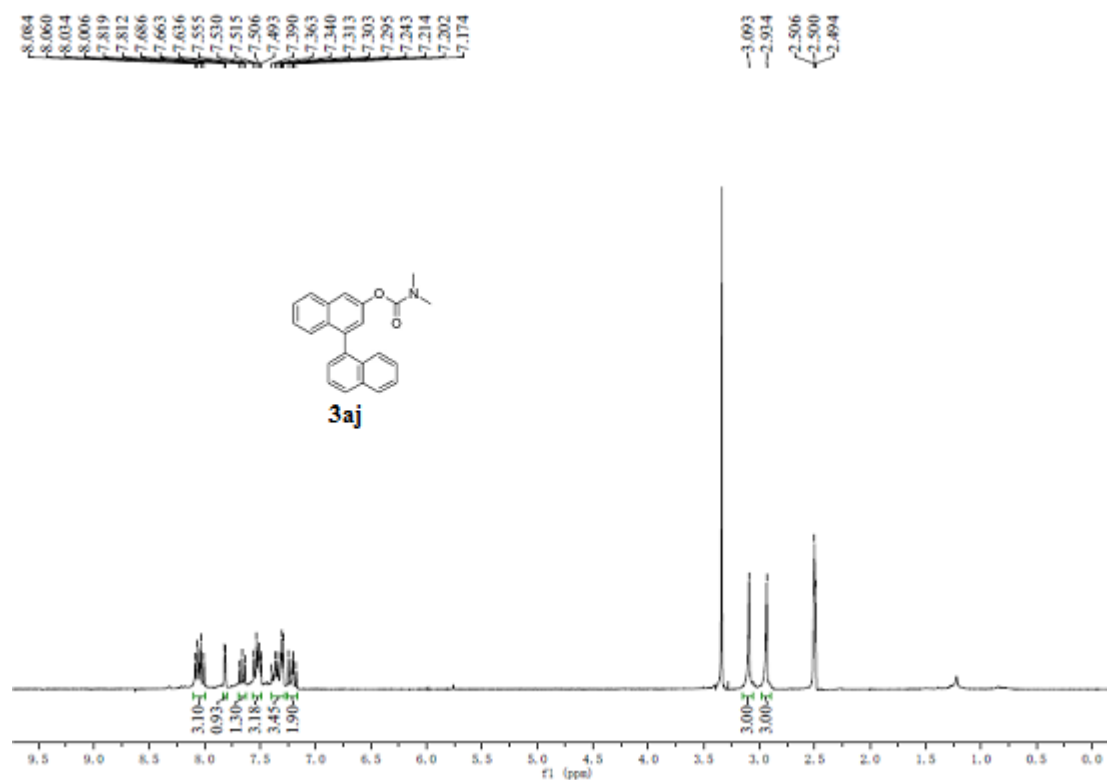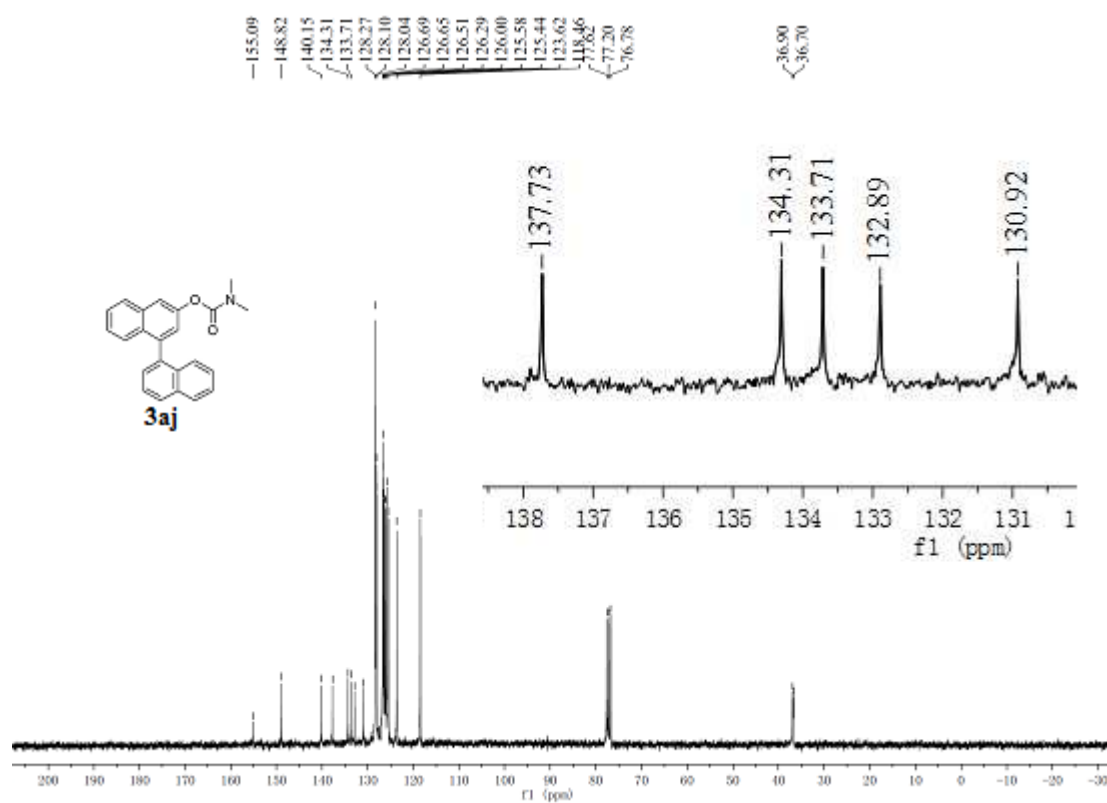

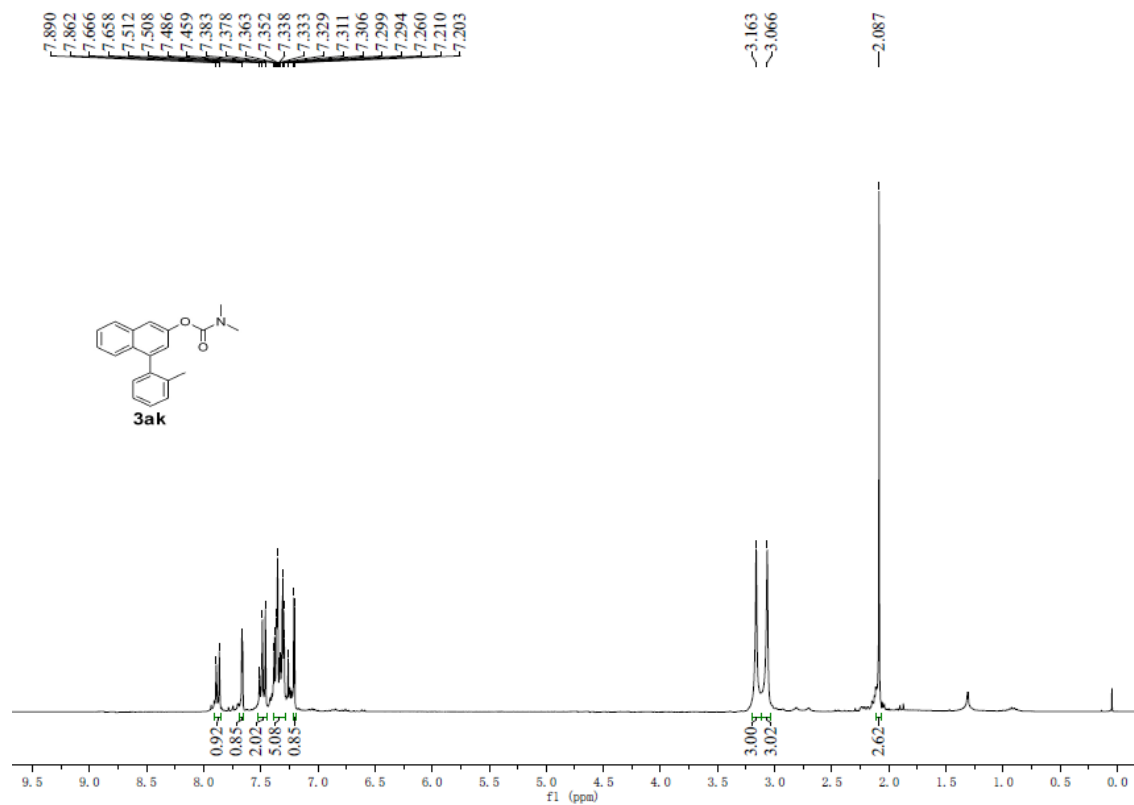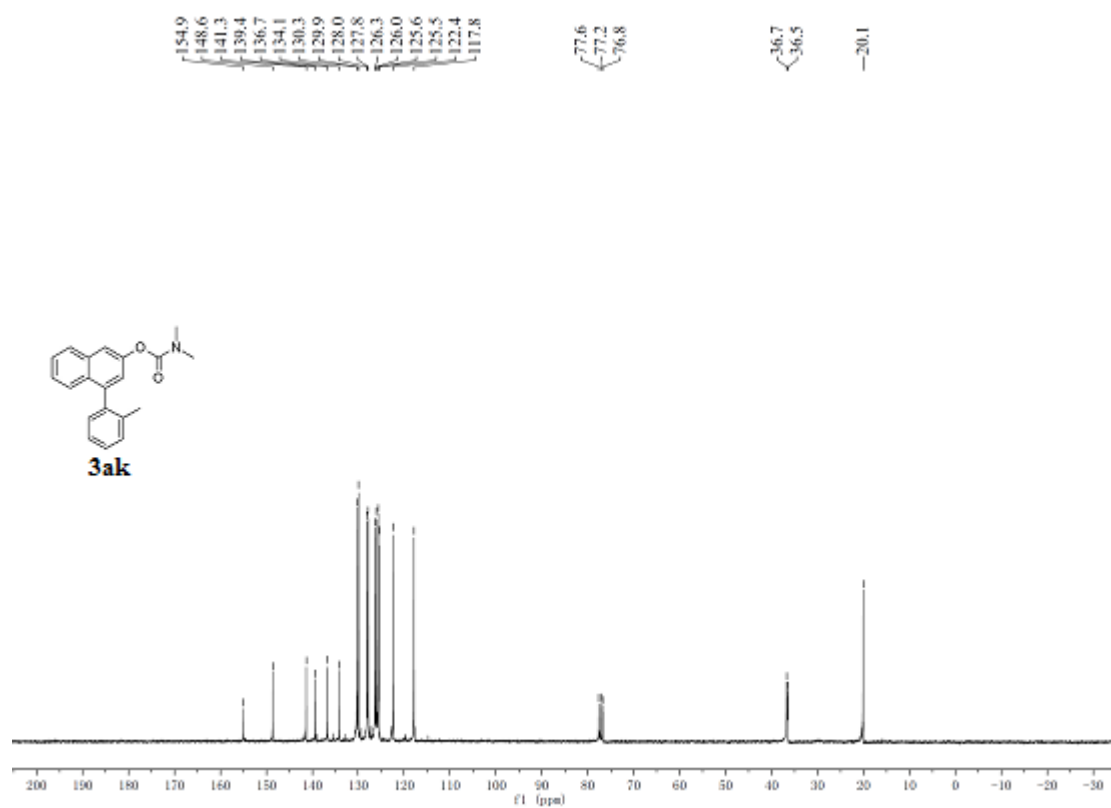

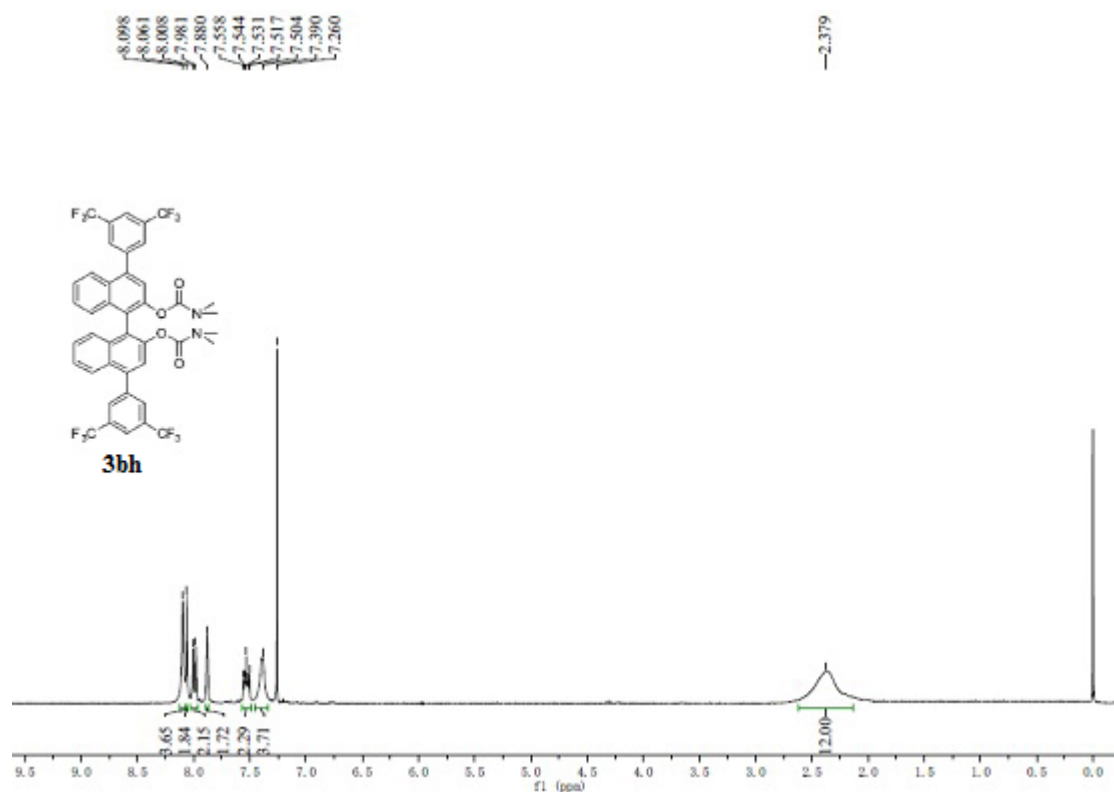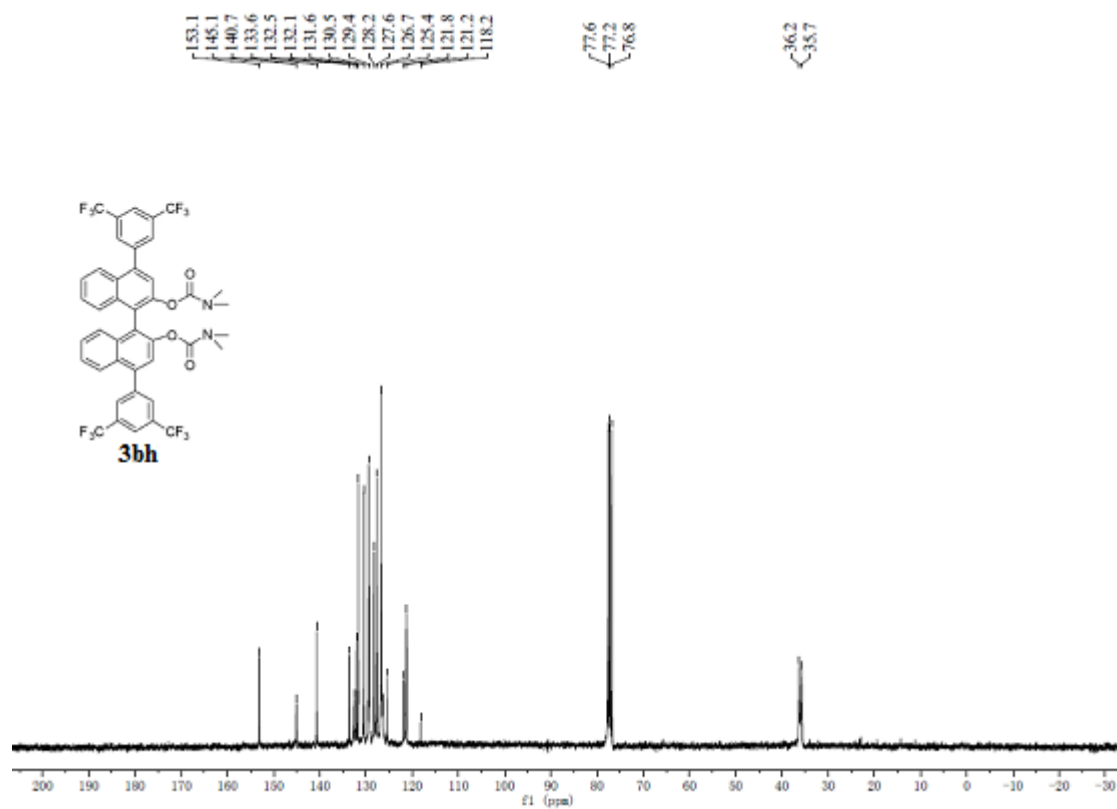



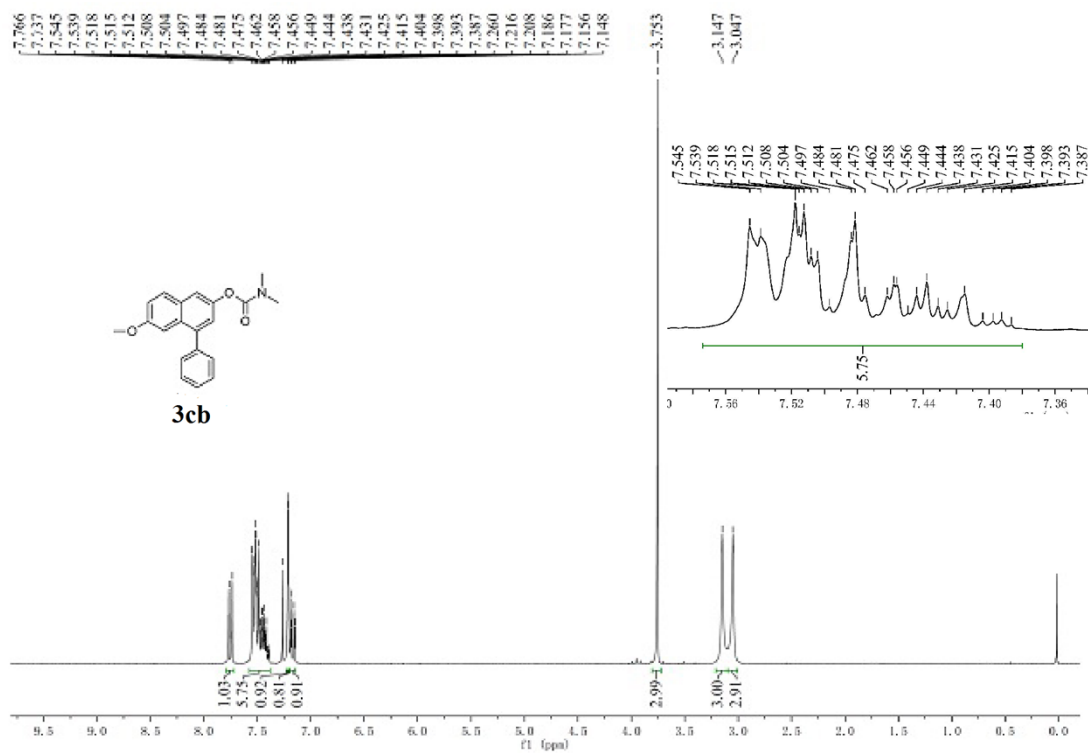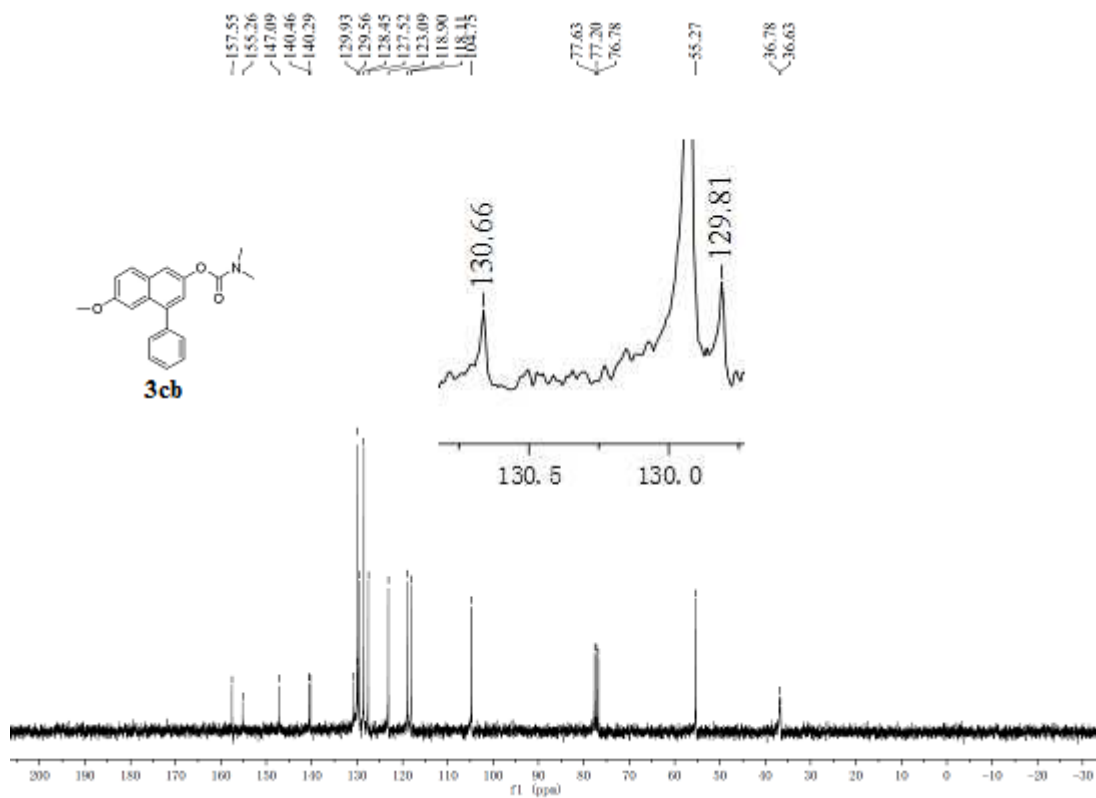

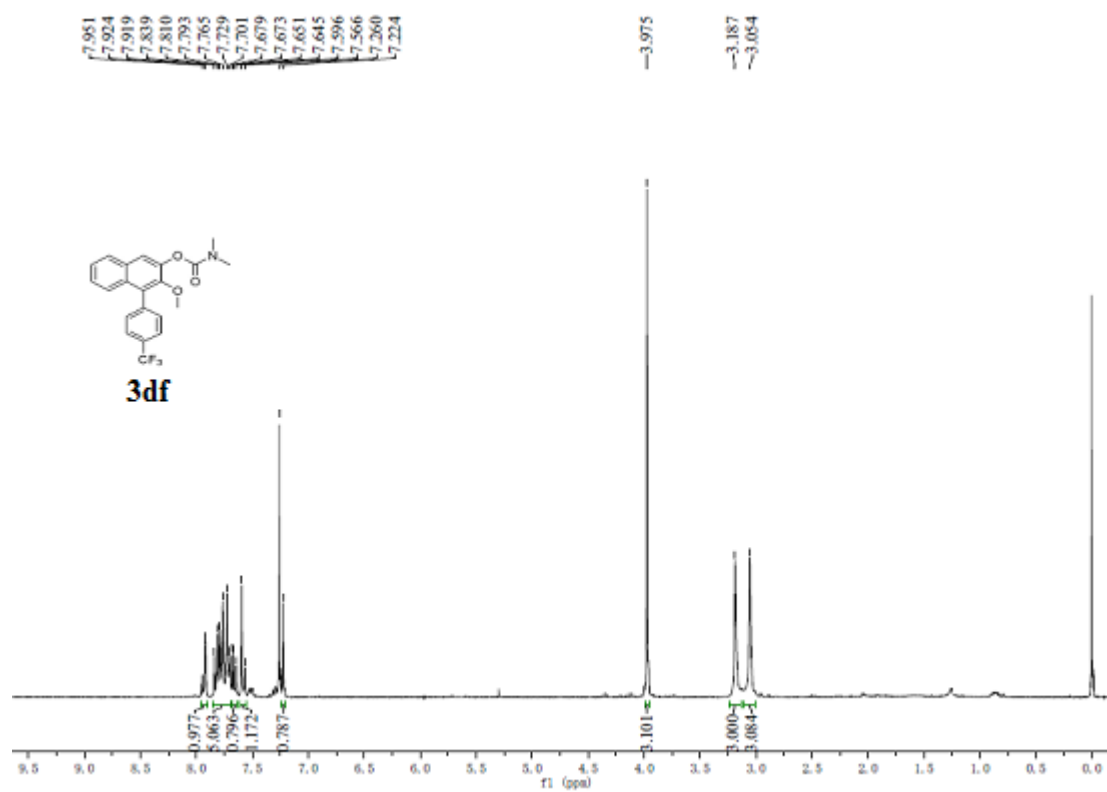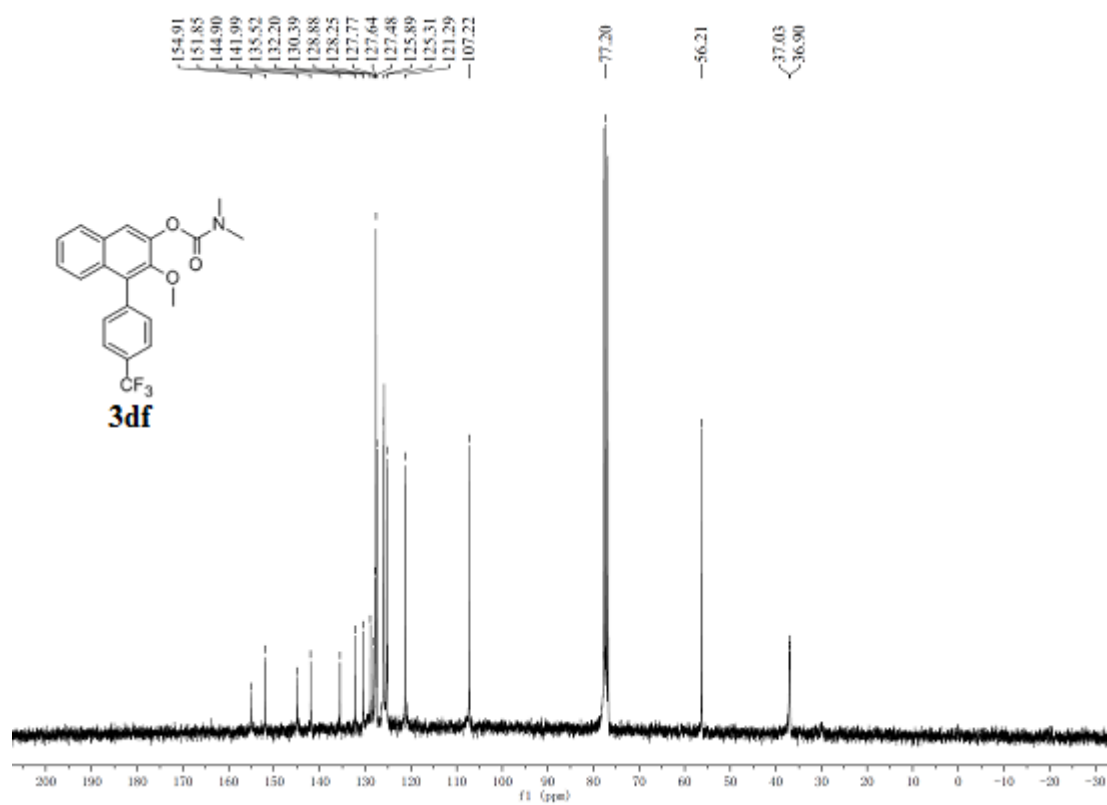

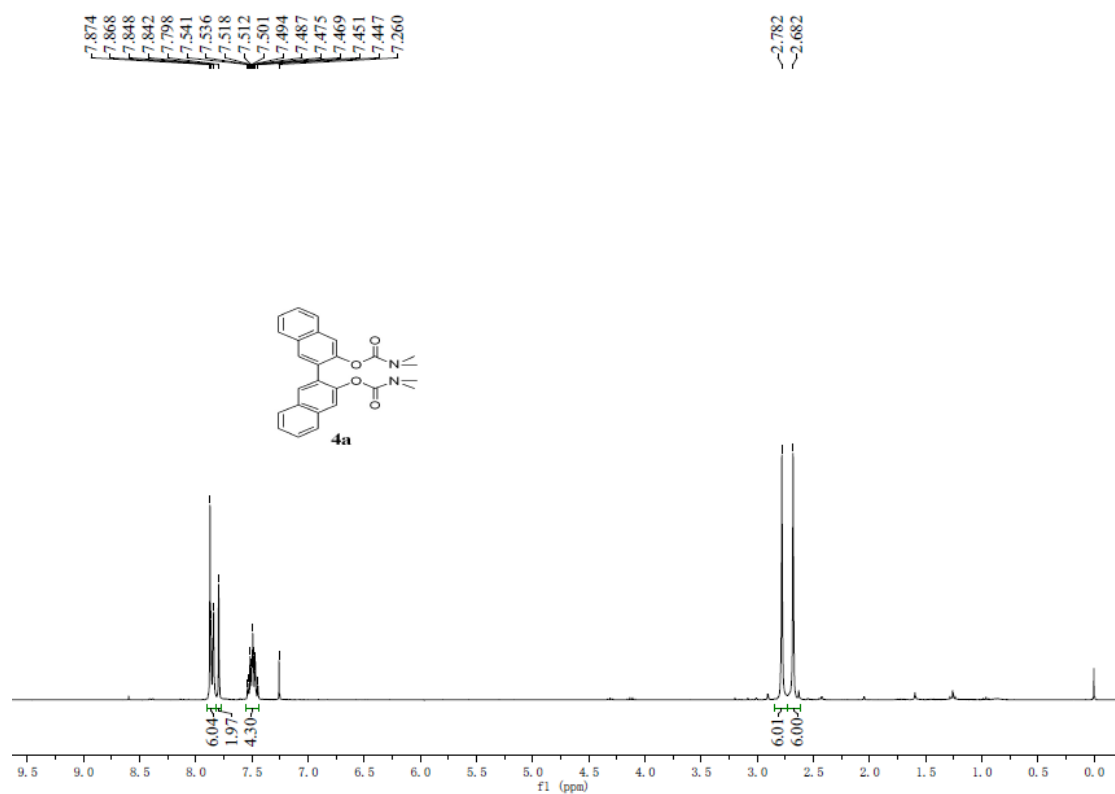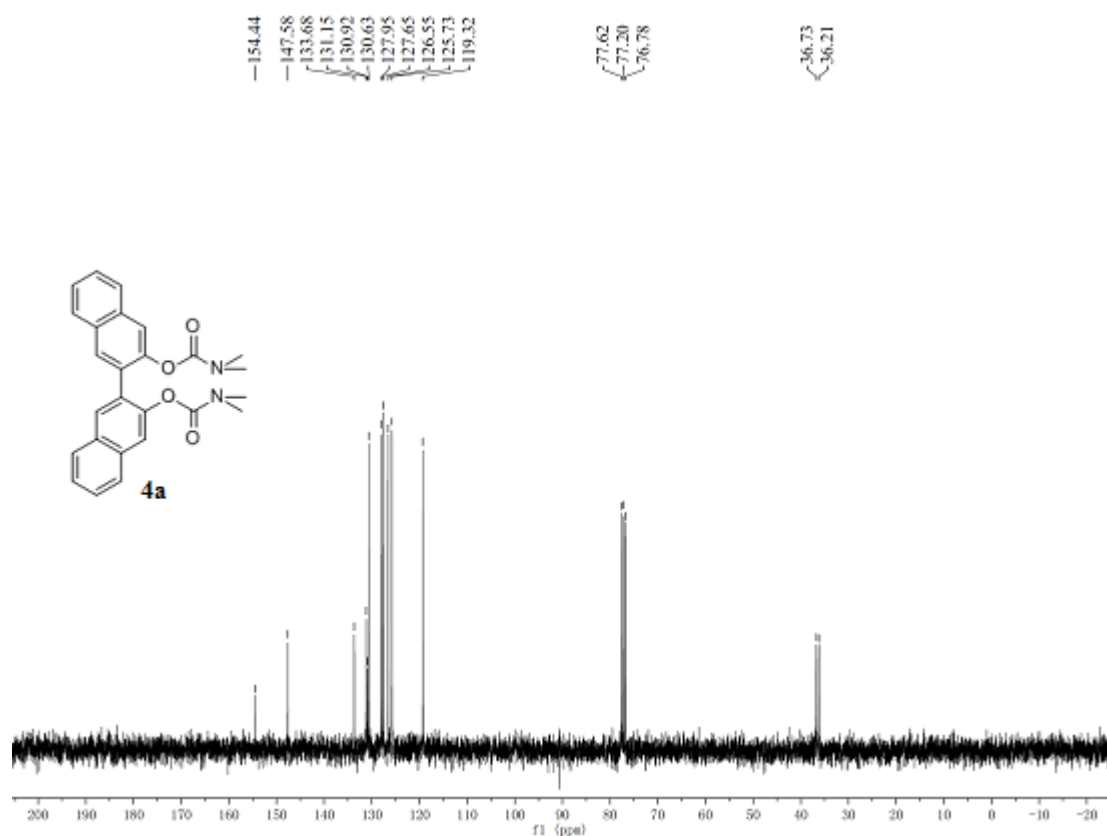

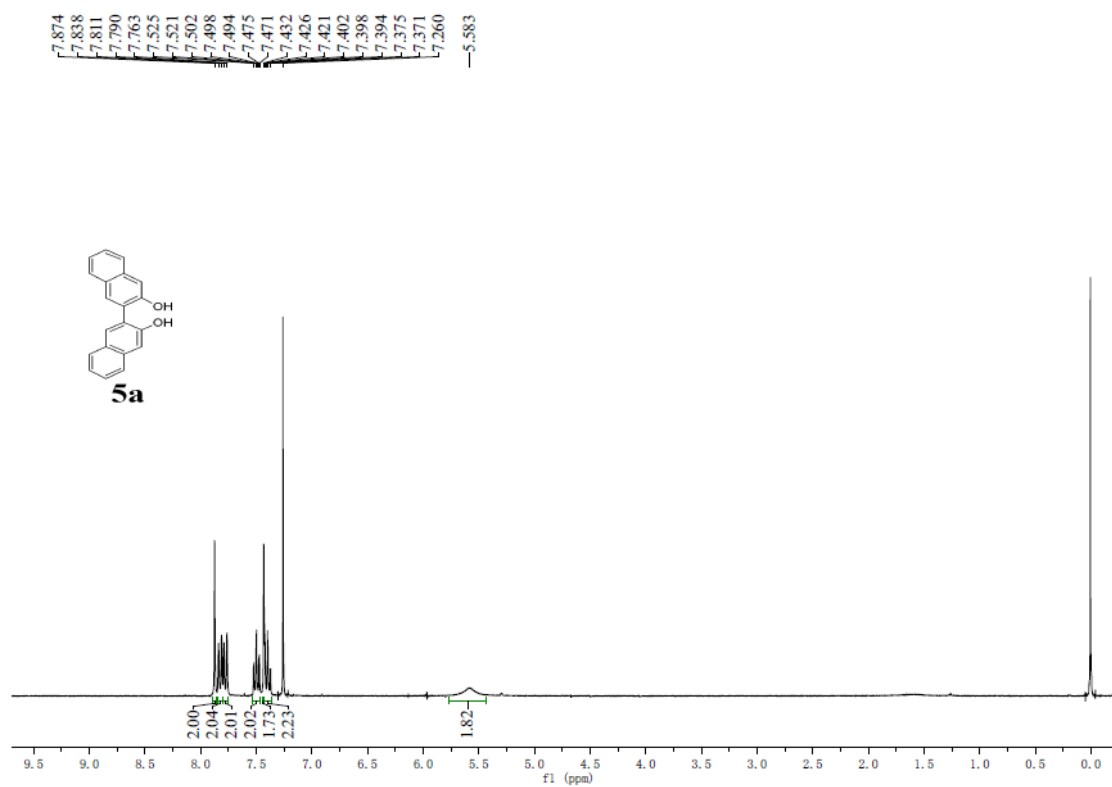

151.4, 135.1, 131.3, 129.4, 128.1, 127.2, 126.6, 126.0, 124.6, 77.6, 77.2, 76.8

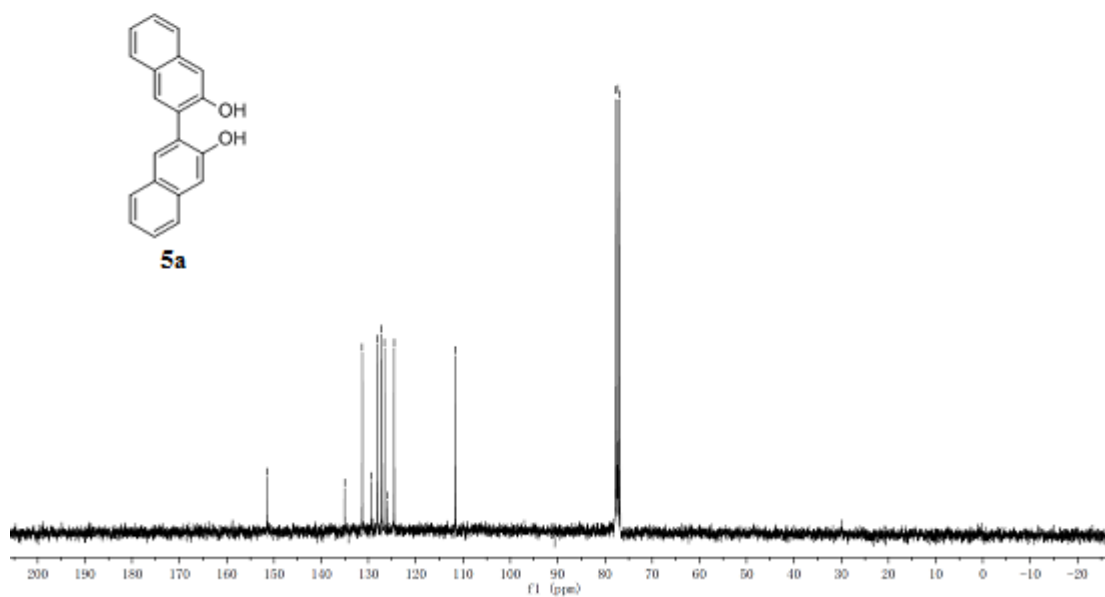

Supplement: c4cc07997c1.pdf [file c4cc07997c1.pdf]
